# Supplementary material
Source: PubMed Central journal article supplement (PMC3776126)
Supplement: 11357_2012_9463_MOESM1_ESM.pdf [file 11357_2012_9463_MOESM1_ESM.pdf]

SUPPLEMENTAL MATERIAL

**Journal of the American Aging Association**

**ROLE OF EPIGENETICS IN HUMAN AGEING AND LONGEVITY: GENOME-WIDE DNA METHYLATION PROFILE IN CENTENARIANS AND CENTENARIANS' OFFSPRING**

Davide Gentilini<sup>a</sup>, Daniela Mari<sup>b,c</sup>, Davide Castaldi<sup>a,d</sup>, Daniel Remondini<sup>e</sup>, Giulia Ogliari<sup>c</sup>, Rita Ostan<sup>f,g</sup>, Laura Bucci<sup>f,g</sup>, Silvia M Sirchia<sup>h</sup>, Silvia Tabano<sup>h</sup>, Francesco Cavagnini<sup>a,b</sup>, Daniela Monti<sup>i</sup>, Claudio Franceschi<sup>f,g</sup>, Anna Maria Di Blasio<sup>a</sup>, Giovanni Vitale<sup>a,b</sup>

<sup>a</sup> Istituto Auxologico Italiano, Milan. Italy

<sup>b</sup> Dipartimento di Scienze Mediche, Università degli Studi di Milano, Milan. Italy

<sup>c</sup> Geriatric Unit IRCCS Ca' Granda Foundation Maggiore Policlinico Hospital, Milan, Italy

<sup>d</sup> Dept. Informatica, Sistemistica e Comunicazione Università degli Studi di Milano - Bicocca

<sup>e</sup> Physics Department of Bologna University, Bologna, Italy

<sup>f</sup> Department of Experimental Pathology, University of Bologna, Bologna, Italy

<sup>g</sup> CIG-Interdepartmental Center "L. Galvani", University of Bologna, Bologna, Italy

<sup>h</sup> Medical Genetics Unit, Dipartimento di Medicina, Chirurgia e Odontoiatria, Università degli Studi di Milano, Milan. Italy

<sup>i</sup> Department of Experimental Pathology and Oncology, University of Florence, Florence, Italy

**Corresponding author:**

Giovanni Vitale

Istituto Auxologico Italiano IRCCS, University of Milan,

Via Zucchi 18, Cusano Milanino 20095 Milan, Italy

e-mail: [giovanni.vitale@unimi.it](mailto:giovanni.vitale@unimi.it)

Phone: +39 02 619112023

Fax: +39 02 619113033

Figure S1

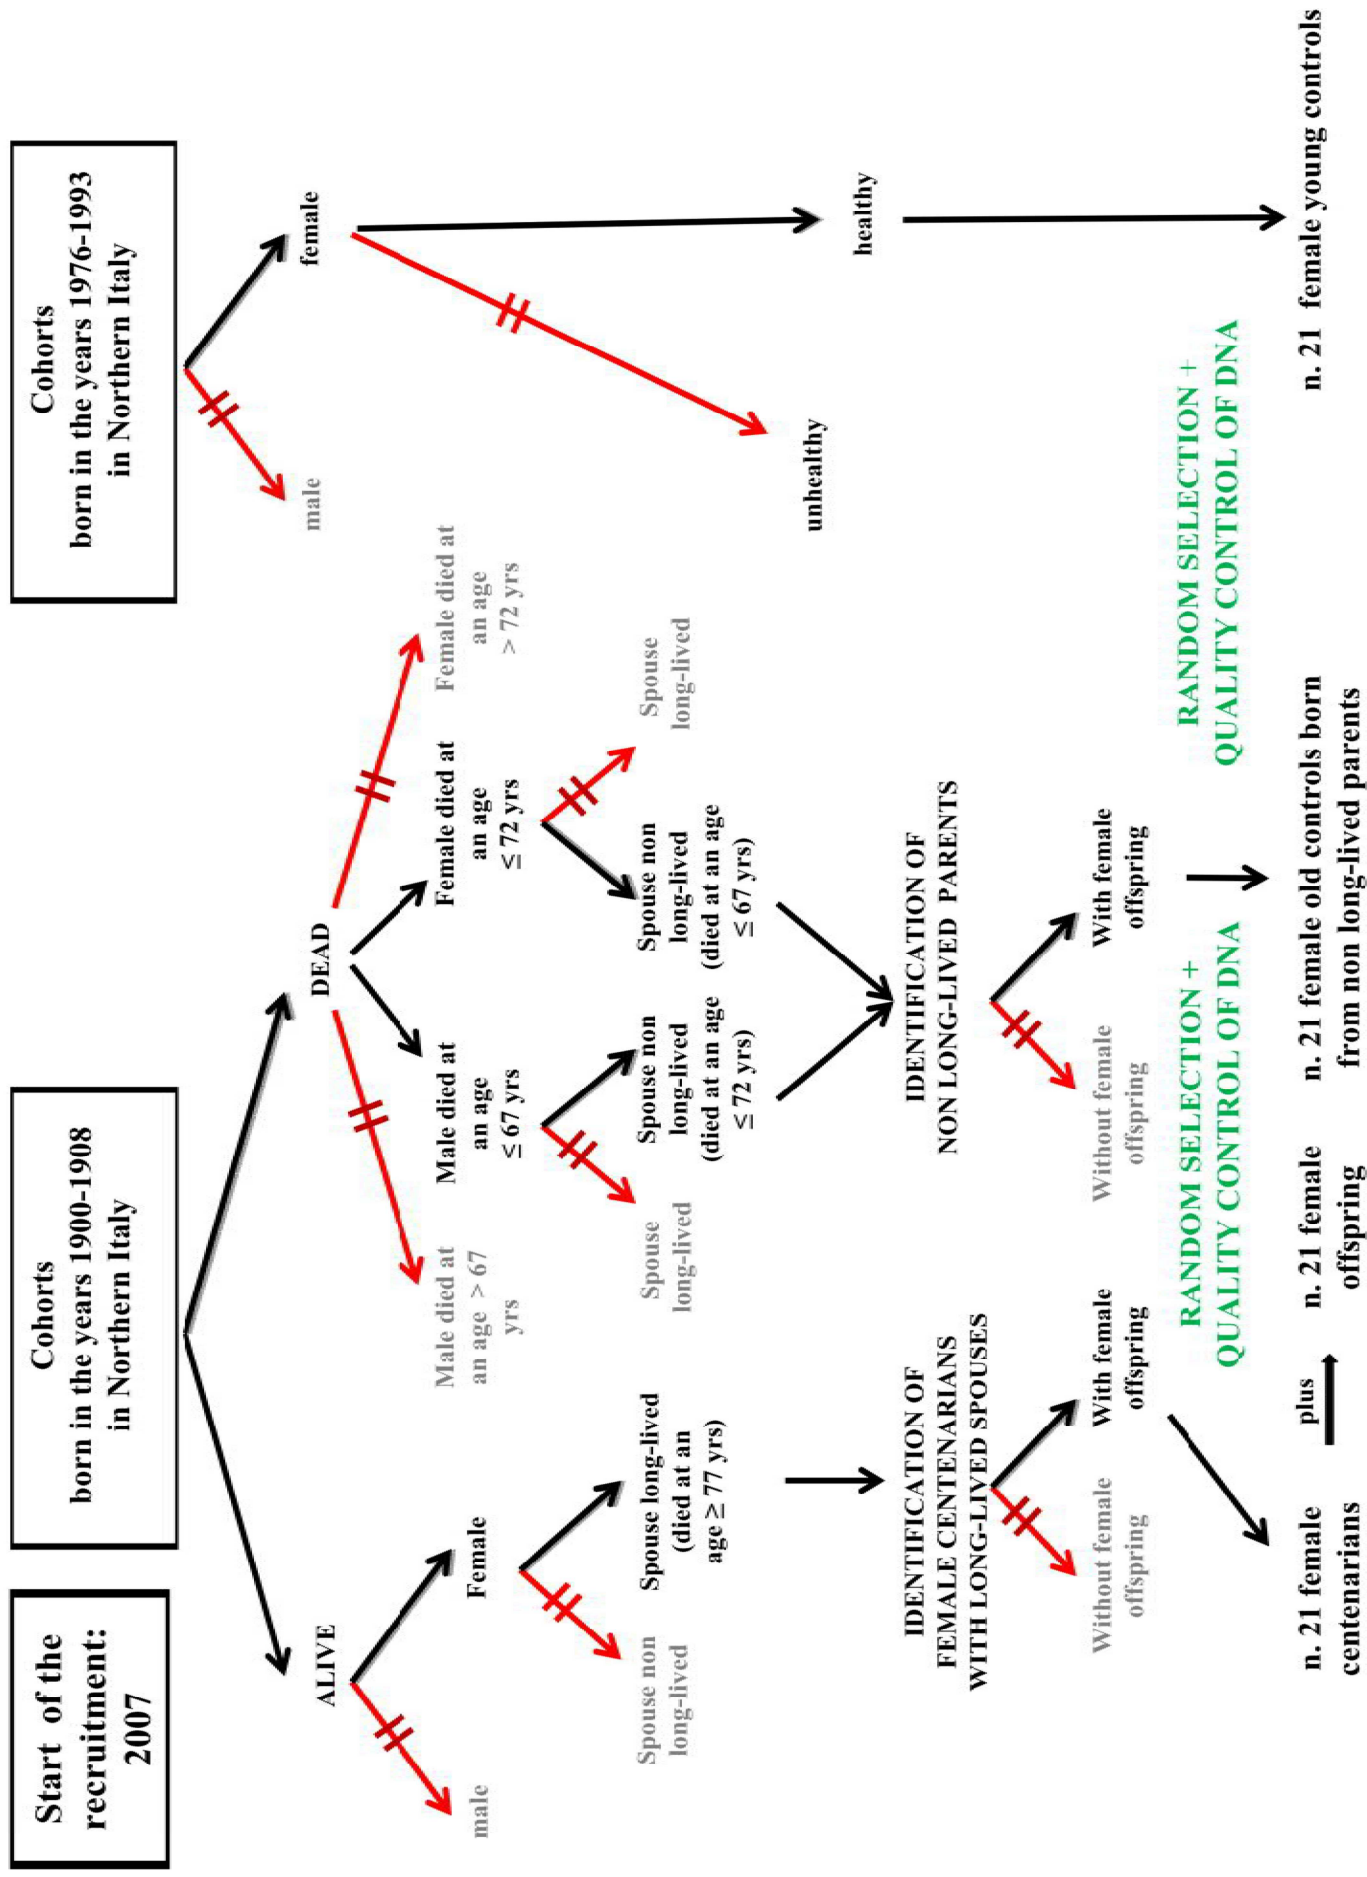



FIGURE S2

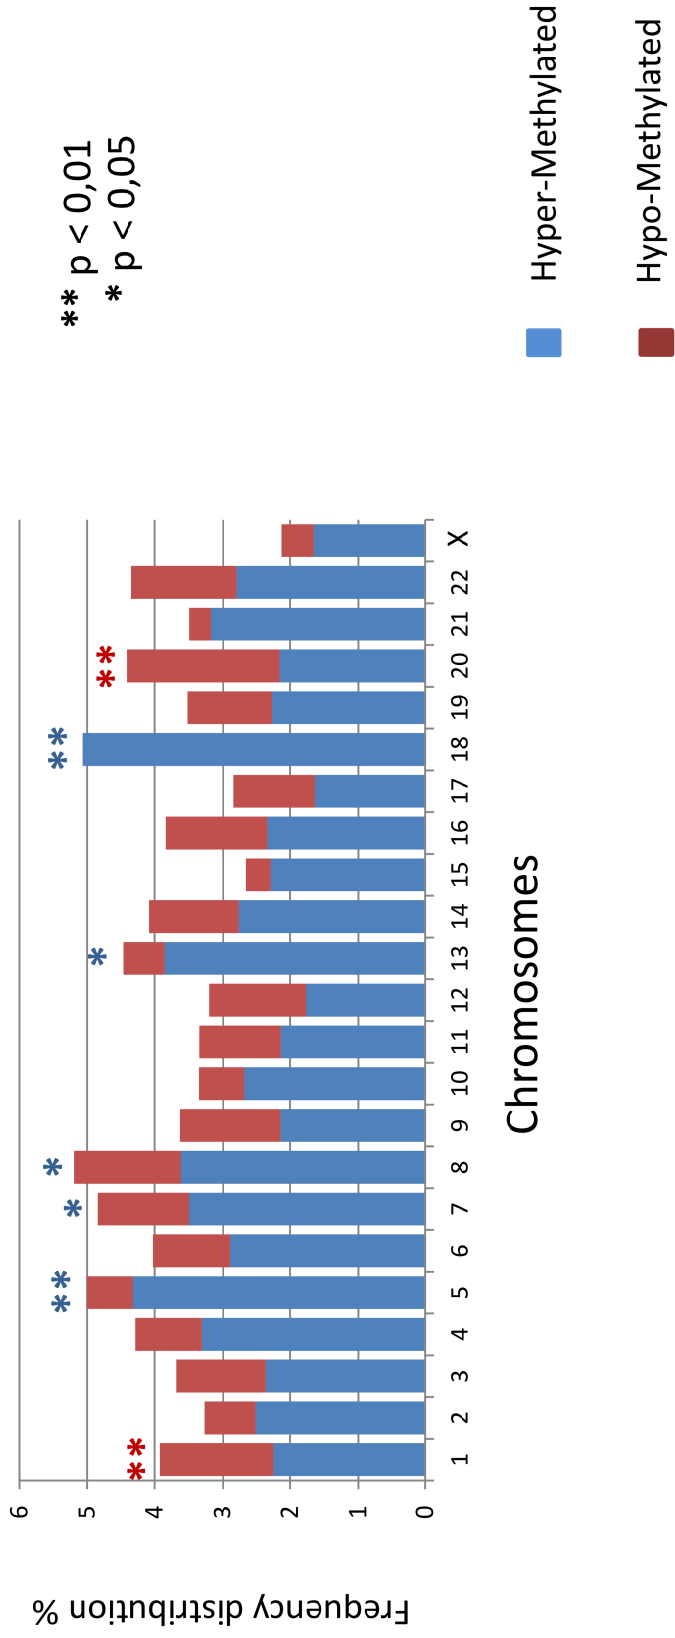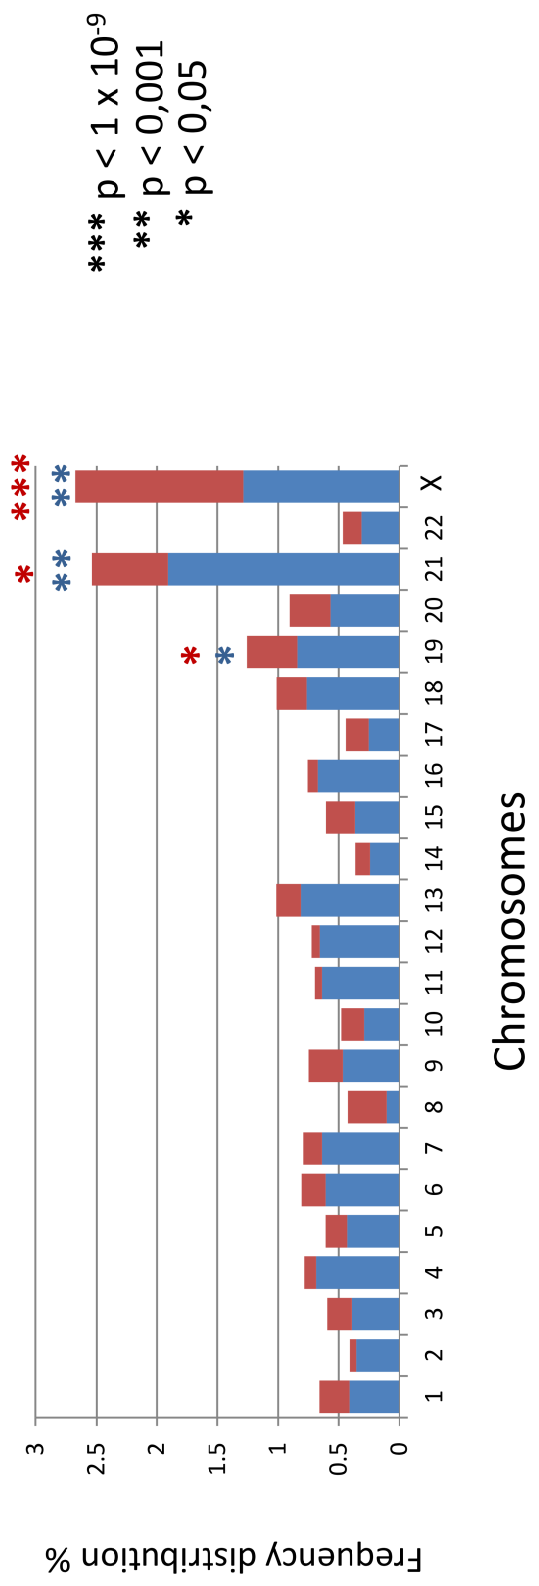

**Table S1.** List of 709 CpG loci concurrently and significantly hypermethylated in centenarians, centenarians'offspring and offspring of non long-lived parents vs young controls. Columns indicate: Illumina Probe ID (ILMNID), NCBI gene symbol of associated gene (SYMBOL), chromosome localisation (CHR) and map informations (MAPINFO). For each probe we reported AVG beta in each group, and DiffScore, that indicates its level of significance vs young controls.

| ILMNID     | SYMBOL   | CHR | MAPINFO   | YOUNG CONTROLS.AVG_Beta | CENTENARIANS' OFFSPRING.AVG_Beta | CENTENARIANS' OFFSPRING.DiffScore | OFFSPRING OF NON LONG-LIVED PARENTS.AVG_Beta | OFFSPRING OF NON LONG-LIVED PARENTS.DiffScore | CENTENARIANS.AVG_Beta | CENTENARIANS.DiffScore |
|------------|----------|-----|-----------|-------------------------|----------------------------------|-----------------------------------|----------------------------------------------|-----------------------------------------------|-----------------------|------------------------|
| cg00002083 | EPB41L3  | 18  | 5533801   | 0.1037196               | 0.2465953                        | 345.9589                          | 0.2238209                                    | 343.9177                                      | 0.3429643             | 356.9969               |
| cg00003047 | C1orf188 | 1   | 6191377   | 0.1830436               | 0.2595659                        | 67.30103                          | 0.2262654                                    | 19.65343                                      | 0.3026838             | 356.9969               |
| cg00059225 | GLRA1    | 5   | 15120450  | 0.3100203               | 0.4008484                        | 0.12017                           | 0.4000643                                    | 79.35060                                      | 0.4554179             | 356.9969               |
| cg00090147 | GATA4    | 8   | 11599776  | 0.07699681              | 0.1097613                        | 22.43563                          | 0.1052215                                    | 15.89458                                      | 0.1485177             | 116.781                |
| cg00107187 | FLJ42486 | 14  | 104442043 | 0.108179                | 0.1830319                        | 94.06365                          | 0.1843359                                    | 96.44795                                      | 0.2433812             | 356.9969               |
| cg00201234 | FBX12    | 3   | 1356598   | 0.04874061              | 0.09484001                       | 59.40055                          | 0.06135988                                   | 28.90079                                      | 0.1330278             | 356.9969               |
| cg00263760 | VAX1     | 10  | 118887356 | 0.0702091               | 0.1003388                        | 19.95589                          | 0.09535724                                   | 13.15087                                      | 0.1279872             | 83.99036               |
| cg00332226 | UNQ739   | 7   | 49794309  | 0.09928816              | 0.1463998                        | 40.09083                          | 0.137474                                     | 25.08844                                      | 0.1962313             | 356.9969               |
| cg00399483 | DCC      | 18  | 48122376  | 0.135937                | 0.1902636                        | 42.19709                          | 0.176813                                     | 22.48832                                      | 0.2575792             | 356.9969               |
| cg00468146 | ID4      | 6   | 19946190  | 0.1443796               | 0.2199524                        | 78.38698                          | 0.2039284                                    | 47.4999                                       | 0.27852               | 356.9969               |
| cg00489401 | FLT4     | 5   | 190008481 | 0.11081                 | 0.1738242                        | 66.18493                          | 0.1589961                                    | 37.42194                                      | 0.2245436             | 356.9969               |
| cg00503840 | DLX5     | 7   | 9848445   | 0.1589734               | 0.2086402                        | 345.9589                          | 0.2272261                                    | 77.91346                                      | 0.2987374             | 356.9969               |
| cg00509070 | PAXO     | 14  | 38200064  | 0.1304173               | 0.1647743                        | 18.27733                          | 0.1854554                                    | 16.71048                                      | 0.2159037             | 115.0004               |
| cg00513220 | MOSC2    | 1   | 218989746 | 0.04936551              | 0.08455218                       | 46.0495                           | 0.07074384                                   | 18.45832                                      | 0.1262772             | 356.9969               |
| cg00548268 | NPTX2    | 7   | 98083766  | 0.3567565               | 0.4498507                        | 67.19811                          | 0.4303972                                    | 39.38696                                      | 0.5544743             | 356.9969               |
| cg00564163 | STEAP4   | 7   | 87773915  | 0.1395559               | 0.1963643                        | 45.40957                          | 0.1895469                                    | 33.78411                                      | 0.2694166             | 356.9969               |
| cg00565988 | TPF3     | 1   | 3558072   | 0.1383988               | 0.2504936                        | 345.9589                          | 0.2334981                                    | 125.5542                                      | 0.3486267             | 356.9969               |
| cg00648140 | ARSD     | X   | 2857661   | 0.1161733               | 0.1406843                        | 23.24054                          | 0.1806083                                    | 23.09327                                      | 0.1689094             | 61.38144               |
| cg00662556 | GALR1    | 18  | 73092352  | 0.1877942               | 0.2315527                        | 20.18571                          | 0.2401823                                    | 29.17411                                      | 0.292103              | 133.3159               |
| cg00884979 | SLC24A3  | 20  | 19141824  | 0.09055097              | 0.1438815                        | 54.97122                          | 0.1255304                                    | 22.38145                                      | 0.1739772             | 140.0187               |
| cg00891278 | CCDC37   | 3   | 127596474 | 0.08068661              | 0.1211678                        | 34.01453                          | 0.1185995                                    | 28.87741                                      | 0.1742096             | 356.9969               |
| cg00911351 | PCDHGB4  | 5   | 140747439 | 0.1054686               | 0.1596223                        | 51.00735                          | 0.1540725                                    | 39.76477                                      | 0.2665049             | 356.9969               |
| cg01120761 | GLEC4C   | 12  | 7794437   | 0.7120936               | 0.7881668                        | 31.81886                          | 0.7630478                                    | 28.86253                                      | 0.7466934             | 14.89856               |
| cg01185154 | F3       | 1   | 94773317  | 0.1224331               | 0.2232587                        | 28.70991                          | 0.224076                                     | 20.51032                                      | 0.2416659             | 48.40326               |
| cg01192900 | BTG4     | 11  | 110888878 | 0.0818556               | 0.1142004                        | 20.8916                           | 0.1122961                                    | 17.98529                                      | 0.1320243             | 59.37128               |
| cg01353448 | C7orf16  | 7   | 31693437  | 0.5469052               | 0.6053257                        | 24.27126                          | 0.5928528                                    | 13.42431                                      | 0.637411              | 68.39827               |
| cg01366419 | WBSRC17  | 7   | 70230607  | 0.06467049              | 0.1209569                        | 75.08253                          | 0.1046721                                    | 37.31326                                      | 0.1751613             | 356.9969               |
| cg01410472 | CRISPLD1 | 8   | 76059630  | 0.03824839              | 0.07560202                       | 44.13685                          | 0.06756757                                   | 26.13106                                      | 0.1132123             | 356.9969               |
| cg01530101 | KCNQ1DN  | 11  | 2847674   | 0.1939044               | 0.2954445                        | 112.2428                          | 0.253817                                     | 57.51321                                      | 0.462471              | 356.9969               |
| cg01530588 | RHPN2    | 19  | 3824790   | 0.05026989              | 0.08743435                       | 35.22188                          | 0.0863264                                    | 34.94523                                      | 0.1088132             | 104.5791               |
| cg01610488 | TRPA1    | 8   | 73159824  | 0.0254792               | 0.05153741                       | 16.25311                          | 0.052751                                     | 17.93489                                      | 0.07860559            | 94.40548               |
| cg01615704 | MALL     | 2   | 110230685 | 0.1148031               | 0.2029855                        | 124.3048                          | 0.2029855                                    | 943.9177                                      | 0.2855446             | 356.9969               |
| cg01643580 | KCNK3    | 2   | 26789903  | 0.1889419               | 0.247915                         | 38.46769                          | 0.2326848                                    | 19.60093                                      | 0.255147              | 56.87874               |
| cg01805282 | EYA4     | 6   | 13360547  | 0.08276454              | 0.142324                         | 72.21758                          | 0.1437913                                    | 75.31274                                      | 0.1650026             | 356.9969               |
| cg01805540 | CACNB2   | 10  | 18489755  | 0.01754042              | 0.03690774                       | 14.72677                          | 0.0378249                                    | 15.94102                                      | 0.07162578            | 122.9798               |
| cg01824804 | LOX      | 5   | 12441377  | 0.06092773              | 0.08717322                       | 16.26747                          | 0.08561418                                   | 13.88404                                      | 0.1117073             | 71.79409               |
| cg01830294 | WNT2     | 12  | 11875928  | 0.1124452               | 0.1834478                        | 83.44378                          | 0.1844372                                    | 48.95111                                      | 0.2619822             | 356.9969               |
| cg01839464 | DCC      | 18  | 48122475  | 0.0570681               | 0.1004403                        | 48.6805                           | 0.09215529                                   | 30.73145                                      | 0.1771084             | 356.9969               |
| cg01946574 | PTPRM    | 18  | 7558186   | 0.04415753              | 0.07276442                       | 23.73957                          | 0.06659186                                   | 13.66891                                      | 0.1137529             | 356.9969               |
| cg02008154 | TBX20    | 7   | 35260062  | 0.0342688               | 0.06571936                       | 32.67156                          | 0.05646088                                   | 15.18087                                      | 0.09679496            | 131.9527               |
| cg02064106 | C6orf118 | 6   | 165642848 | 0.04437475              | 0.0745578                        | 26.48452                          | 0.06973205                                   | 17.93718                                      | 0.1360039             | 356.9969               |
| cg02065507 | TRIP10   | 19  | 6690192   | 0.5007697               | 0.5705259                        | 34.92173                          | 0.5581263                                    | 21.86305                                      | 0.6196202             | 125.9381               |
| cg02148834 | TRAF3    | 5   | 10794485  | 0.1887958               | 0.2424643                        | 68.69899                          | 0.2313049                                    | 42.99221                                      | 0.2959987             | 356.9969               |
| cg02154186 | PNMA2    | 8   | 28427270  | 0.1046389               | 0.1654421                        | 62.55444                          | 0.160494                                     | 53.58973                                      | 0.236818              | 356.9969               |
| cg02194876 | EPHA8    | 1   | 22762865  | 0.05280737              | 0.0918343                        | 40.88748                          | 0.08973596                                   | 35.52229                                      | 0.1423159             | 356.9969               |
| cg02205094 | ONECUT2  | 18  | 53254351  | 0.08942147              | 0.1443737                        | 58.75301                          | 0.1465642                                    | 62.77501                                      | 0.2097671             | 356.9969               |
| cg02265318 | MOSC1    | 1   | 219027162 | 0.03339828              | 0.07435572                       | 55.88121                          | 0.06344078                                   | 29.21899                                      | 0.122521              | 356.9969               |
| cg02325925 | GRM7     | 3   | 6878153   | 0.2024601               | 0.2968007                        | 76.3865                           | 0.2639755                                    | 38.67755                                      | 0.333139              | 356.9969               |
| cg02337714 | DG5      | 5   | 17868988  | 0.1887958               | 0.2424643                        | 68.69899                          | 0.2313049                                    | 42.99221                                      | 0.2959987             | 356.9969               |
| cg02409351 | CART1    | 12  | 84198153  | 0.04817843              | 0.07805327                       | 24.8028                           | 0.07425106                                   | 18.15831                                      | 0.1027811             | 356.9969               |
| cg02489552 | FLJ40365 | 19  | 14982531  | 0.4687786               | 0.5599118                        | 62.56156                          | 0.5548135                                    | 54.13176                                      | 0.5746261             | 96.34354               |
| cg02497758 | MAFB     | 20  | 38750608  | 0.08159045              | 0.1447949                        | 81.76941                          | 0.1524618                                    | 10.56511                                      | 0.218475              | 356.9969               |
| cg02519218 | CHFR     | 12  | 131934359 | 0.7883109               | 0.8353679                        | 34.47505                          | 0.8378667                                    | 37.91928                                      | 0.8509482             | 76.44899               |
| cg02590345 | PRG-3    | 9   | 102830780 | 0.07307483              | 0.1061118                        | 23.73814                          | 0.09950652                                   | 14.22715                                      | 0.1657701             | 356.9969               |
| cg02613366 | FXR3     | 11  | 6862859   | 0.1189958               | 0.1887958                        | 68.69899                          | 0.1808642                                    | 35.98722                                      | 0.2591383             | 356.9969               |
| cg02620013 | MLNR     | 13  | 48692682  | 0.192496                | 0.258307                         | 47.74123                          | 0.2644019                                    | 56.39636                                      | 0.332438              | 356.9969               |
| cg02624129 | SNX19    | 11  | 130291440 | 0.1074288               | 0.1404128                        | 17.60402                          | 0.1385967                                    | 15.1668                                       | 0.1609655             | 56.1484                |
| cg02624705 | DCC      | 18  | 48122676  | 0.05230924              | 0.09320725                       | 45.40957                          | 0.0813233                                    | 21.74127                                      | 0.1673956             | 356.9969               |
| cg02757432 | GPR26    | 10  | 125416038 | 0.2024236               | 0.2884938                        | 46.27553                          | 0.2606018                                    | 34.34783                                      | 0.333334              | 356.9969               |
| cg02844545 | GCM2     | 6   | 10990299  | 0.1612136               | 0.2278357                        | 56.12917                          | 0.2273762                                    | 54.37157                                      | 0.2964909             | 356.9969               |
| cg02854288 | FHIT     | 3   | 61211961  | 0.0531373               | 0.0719147                        | 14.72698                          | 0.07338815                                   | 13.34067                                      | 0.1113826             | 98.11217               |
| cg02919422 | SOX17    | 8   | 5553097   | 0.1311225               | 0.2096452                        | 90.56042                          | 0.1952758                                    | 60.12596                                      | 0.2709822             | 356.9969               |
| cg02949456 | NEFH     | 22  | 28206534  | 0.3119534               | 0.3835489                        | 40.62988                          | 0.39744                                      | 58.78839                                      | 0.4298958             | 127.4081               |
| cg03000846 | RAC3     | 17  | 77583552  | 0.3493271               | 0.4129453                        | 29.4464                           | 0.3978546                                    | 15.54996                                      | 0.4283196             | 54.63992               |
| cg03026462 | FOXA1    | 14  | 37134241  | 0.02130686              | 0.04256215                       | 17.04035                          | 0.04493037                                   | 20.87672                                      | 0.08026647            | 137.0993               |
| cg03138091 | OSMR     | 5   | 38882297  | 0.05935208              | 0.1313639                        | 124.3048                          | 0.1145495                                    | 75.40536                                      | 0.153174              | 356.9969               |
| cg03160135 | VGLL2    | 6   | 117663614 | 0.1017245               | 0.1468012                        | 36.6796                           | 0.1330749                                    | 16.50153                                      | 0.1717481             | 95.81762               |
| cg03251079 | HMGAC2   | 12  | 8453032   | 0.0485145               | 0.08311868                       | 31.60365                          | 0.0811242                                    | 21.70941                                      | 0.1208023             | 356.9969               |
| cg03257423 | ZNF228   | 19  | 49552660  | 0.1870638               | 0.2391785                        | 29.70893                          | 0.2322293                                    | 21.24894                                      | 0.2443666             | 42.72662               |
| cg03258472 | CRB3     | 19  | 6141949   | 0.447185                | 0.4947363                        | 14.05914                          | 0.4950003                                    | 14.21538                                      | 0.5774776             | 356.9969               |
| cg03355526 | ZNF454   | 5   | 178301021 | 0.1585148               | 0.2588111                        | 126.8282                          | 0.2580333                                    | 124.1712                                      | 0.3661806             | 356.9969               |
| cg03365437 | ALDH1A2  | 15  | 58145166  | 0.07847811              | 0.1491558                        | 103.4532                          | 0.1418174                                    | 83.53489                                      | 0.2047241             | 356.9969               |
| cg03469654 | KIAA1944 | 12  | 128953814 | 0.06480414              | 0.0962482                        | 23.52023                          | 0.09194982                                   | 16.81299                                      | 0.1588749             | 356.9969               |
| cg03504849 | KCNJ14   | 11  | 2927418   | 0.07198998              | 0.10792794                       | 41.81608                          | 0.10792794                                   | 24.33332                                      | 0.1518337             | 356.9969               |
| cg03544320 | CRMP1    | 4   | 5945592   | 0.1717747               | 0.345589                         | 34.5589                           | 0.3276098                                    | 34.31797                                      | 0.5183777             | 356.9969               |
| cg03552103 | 40A22    | 2   | 109730291 | 0.209815                | 0.2615997                        | 26.59616                          | 0.2482327                                    | 13.34067                                      | 0.2844464             | 65.84077               |
| cg03554552 | PPP1R13L | 19  | 50599886  | 0.1167659               | 0.1844846                        | 73.49419                          | 0.1750455                                    | 53.83677                                      | 0.2419063             | 356.9969               |
| cg03567830 | NTR3     | 20  | 60810316  | 0.0486228               | 0.1066273                        | 91.9276                           | 0.08251549                                   | 31.28369                                      | 0.14778               | 356.9969               |
| cg03664992 | BMFBFA   | 1   | 39729880  | 0.05270652              | 0.1069888                        | 78.08353                          | 0.08690518                                   | 34.87819                                      | 0.1231294             | 137.0993               |
| cg03692712 | LOXL1    | 15  | 7200610   | 0.0485145               | 0.08311868                       | 31.60365                          | 0.0811242                                    | 21.70941                                      | 0.1208023             | 356.9969               |
| cg03724463 | CKK      | 3   | 42281528  | 0.1449895               | 0.194167                         | 32.52631                          | 0.1888779                                    | 24.79257                                      | 0.285115              | 356.9969               |
| cg03748474 | FLJ42486 | 14  | 10444227  | 0.08943477              | 0.1847147                        | 345.9589                          | 0.1854039                                    | 343.9177                                      | 0.3040348             | 356.9969               |
| cg03755123 | UTF1     | 10  | 134893498 | 0.1042894               | 0.153083                         | 41.45416                          | 0.1393522                                    | 20.17363                                      | 0.1830121             | 116.1857               |
| cg03760483 | ALOX12   | 17  | 6840021   | 0.4327002               | 0.4952255                        | 26.56881                          | 0.4941481                                    | 24.88215                                      | 0.5289948             | 78.35742               |
| cg03762453 | FLJ90575 | 4   | 7094836   | 0.3457804               | 0.4222689                        | 44.81948                          | 0.4097907                                    | 29.2173                                       | 0.4733632             |                        |

|            |          |    |           |            |            |          |            |          |            |          |
|------------|----------|----|-----------|------------|------------|----------|------------|----------|------------|----------|
| cg04943986 | NR2F2    | 15 | 94674872  | 0.03742087 | 0.05881792 | 13.80595 | 0.05888719 | 13.66342 | 0.084776   | 78.83067 |
| cg04953257 | PLAC2    | 19 | 511915    | 0.358434   | 0.413901   | 20.55855 | 0.3547072  | 13.7207  | 0.4577715  | 85.03325 |
| cg05071677 | OR2V2    | 5  | 180514566 | 0.774358   | 0.8210004  | 30.87133 | 0.8110485  | 16.86691 | 0.8125611  | 23.79645 |
| cg05158615 | NPY      | 7  | 24290084  | 0.07575507 | 0.1027549  | 14.90047 | 0.1054485  | 16.8329  | 0.1327992  | 78.65313 |
| cg05266781 | IRX5     | 16 | 53522993  | 0.1153342  | 0.1785673  | 64.94033 | 0.1663723  | 41.05763 | 0.2192224  | 356.9969 |
| cg05373457 | KCNS2    | 8  | 99509124  | 0.1586654  | 0.2239179  | 54.54021 | 0.2052961  | 26.14511 | 0.2996148  | 356.9969 |
| cg05380982 | KCNJ6    | 21 | 38210248  | 0.1043541  | 0.1526606  | 40.65909 | 0.1378313  | 18.22367 | 0.1959939  | 356.9969 |
| cg05472874 | SUL1T41  | 22 | 42589512  | 0.03410842 | 0.0726004  | 66.48705 | 0.0626231  | 86.87353 | 0.1447877  | 356.9969 |
| cg05488832 | ABID9    | 19 | 15304174  | 0.1855281  | 0.256564   | 58.84507 | 0.1791771  | 42.4259  | 0.2383489  | 356.9969 |
| cg05595345 | ARRDC4   | 15 | 98305177  | 0.03568664 | 0.07816295 | 58.75301 | 0.09002466 | 92.46243 | 0.1474889  | 356.9969 |
| cg05670348 | LARGE    | 22 | 32646316  | 0.03897029 | 0.0959262  | 93.97569 | 0.0884783  | 71.76256 | 0.1486636  | 356.9969 |
| cg05674944 | SLC30A2  | 1  | 26244877  | 0.05469781 | 0.09493326 | 42.81017 | 0.08117611 | 17.4704  | 0.1149332  | 102.6714 |
| cg05675373 | KCNC4    | 1  | 110555780 | 0.05408006 | 0.09017757 | 34.56684 | 0.08821253 | 29.97945 | 0.1493389  | 356.9969 |
| cg05764376 | THAP10   | 15 | 68971644  | 0.02404737 | 0.05024135 | 25.50885 | 0.05250539 | 29.54331 | 0.106053   | 356.9969 |
| cg05839236 | NRK1     | 5  | 32747954  | 0.05980747 | 0.09489742 | 45.02318 | 0.08248519 | 21.11397 | 0.1347922  | 356.9969 |
| cg05961595 | APEX2    | X  | 55043210  | 0.3394047  | 0.3859261  | 14.66138 | 0.3959712  | 22.38286 | 0.420635   | 85.45077 |
| cg06092815 | SKIP     | 2  | 228754650 | 0.2399937  | 0.3009683  | 34.18821 | 0.2832834  | 15.61036 | 0.3450294  | 116.3049 |
| cg06147863 | SP11     | 11 | 47356689  | 0.1434831  | 0.1955656  | 37.04292 | 0.1819675  | 18.85444 | 0.2246562  | 99.97074 |
| cg06187947 | GULP1    | 2  | 188865287 | 0.06745885 | 0.1113653  | 45.20123 | 0.1029895  | 28.45634 | 0.1527686  | 356.9969 |
| cg06263495 | ASCL2    | 11 | 2248580   | 0.06583132 | 0.1245574  | 80.63603 | 0.1135254  | 53.1445  | 0.19844    | 356.9969 |
| cg06268894 | CELSR1   | 22 | 48591307  | 0.1477191  | 0.2021057  | 34.53589 | 0.3211659  | 34.9177  | 0.4715517  | 356.9969 |
| cg06291867 | HTR7     | 10 | 92607142  | 0.1050844  | 0.1656422  | 63.69999 | 0.1696127  | 71.76256 | 0.23152    | 356.9969 |
| cg06391468 | SOX9     | 17 | 67629125  | 0.156036   | 0.2274875  | 66.10519 | 0.2064578  | 31.34768 | 0.3252977  | 356.9969 |
| cg06493386 | TRPA1    | 8  | 73150351  | 0.09949005 | 0.14441    | 36.28698 | 0.1331296  | 19.20684 | 0.1548756  | 62.99731 |
| cg06493994 | SCGN     | 6  | 25760581  | 0.05548509 | 0.1135101  | 86.35611 | 0.1115784  | 80.58109 | 0.1659624  | 356.9969 |
| cg06498267 | HGN1     | 5  | 45731679  | 0.07791603 | 0.1265631  | 50.74826 | 0.1221586  | 40.69715 | 0.1748752  | 356.9969 |
| cg06527160 | KCNK3    | 19 | 55523713  | 0.0684939  | 0.0989105  | 59.9937  | 0.06898258 | 36.10732 | 0.2070554  | 356.9969 |
| cg06575478 | SOX1     | 13 | 111769787 | 0.1870304  | 0.2629462  | 65.34415 | 0.2697437  | 77.24375 | 0.3414745  | 356.9969 |
| cg06713098 | IGFBP3   | 7  | 45926892  | 0.05564455 | 0.1256808  | 122.6092 | 0.1255197  | 120.9217 | 0.183866   | 356.9969 |
| cg06744574 | C1orf165 | 1  | 49014946  | 0.02234218 | 0.0551074  | 41.30196 | 0.06474753 | 67.60928 | 0.121092   | 356.9969 |
| cg06781209 | FADS2    | 11 | 61351573  | 0.07166253 | 0.09944863 | 18.50534 | 0.1009633  | 18.16099 | 0.1307981  | 86.60954 |
| cg06810847 | CRAMP1L  | 16 | 1600595   | 0.2157528  | 0.2738189  | 33.42354 | 0.2050511  | 18.47746 | 0.3180712  | 117.9622 |
| cg06904813 | PNWAA6   | X  | 19199896  | 0.7335941  | 0.7659854  | 43.51945 | 0.7379726  | 17.01169 | 0.781624   | 27.86257 |
| cg06942110 | INT1     | 7  | 1511911   | 0.5549548  | 0.6250881  | 37.64114 | 0.6307929  | 43.89805 | 0.6490921  | 62.17482 |
| cg06954481 | GBX2     | 2  | 236741236 | 0.04009071 | 0.07461951 | 36.8688  | 0.07555471 | 37.81327 | 0.1319244  | 356.9969 |
| cg07015629 | ERBB4    | 2  | 213111457 | 0.02592903 | 0.04708511 | 15.72476 | 0.04784284 | 16.67756 | 0.0799997  | 112.1546 |
| cg07028533 | CNTNAP2  | 7  | 145444372 | 0.04894852 | 0.08011342 | 26.86885 | 0.07610241 | 19.46229 | 0.1291127  | 356.9969 |
| cg07103493 | SLC27A6  | 5  | 126329131 | 0.06936118 | 0.1171822  | 52.74544 | 0.1168263  | 50.82102 | 0.1641235  | 356.9969 |
| cg07269592 | LPA      | 6  | 16102812  | 0.2483986  | 0.3198631  | 48.81945 | 0.2489918  | 24.82366 | 0.3628672  | 356.9969 |
| cg07271264 | MYOD1    | 11 | 17897553  | 0.0960519  | 0.1572959  | 69.20882 | 0.1450991  | 45.09281 | 0.2219143  | 356.9969 |
| cg07442479 | GDNF     | 5  | 3878526   | 0.1178458  | 0.1613192  | 29.62859 | 0.156296   | 22.22721 | 0.1991946  | 114.2404 |
| cg07533148 | TRIM58   | 1  | 246087435 | 0.0213269  | 0.04628451 | 23.96069 | 0.04877245 | 28.49517 | 0.09374505 | 356.9969 |
| cg07536847 | PAX7     | 1  | 18829819  | 0.05651977 | 0.08701278 | 23.66128 | 0.08045493 | 13.62488 | 0.1033738  | 64.44447 |
| cg07564555 | ANKRD38  | 1  | 62657350  | 0.02495706 | 0.04468419 | 13.74117 | 0.04691462 | 16.94682 | 0.07310201 | 92.69056 |
| cg07570142 | MOXD1    | 6  | 13278414  | 0.03932362 | 0.07338711 | 36.16616 | 0.06708732 | 23.01295 | 0.1096125  | 356.9969 |
| cg07572341 | FOXP2    | 22 | 22511942  | 0.05901942 | 0.14241349 | 40.31489 | 0.12594674 | 16.73174 | 0.1739464  | 356.9969 |
| cg07611334 | C2orf98  | 20 | 275811    | 0.0594569  | 0.09010877 | 23.1856  | 0.08608822 | 16.76734 | 0.11558    | 87.01244 |
| cg07621046 | C1orf82  | 10 | 118419648 | 0.2178773  | 0.2841501  | 44.02258 | 0.2783255  | 35.16254 | 0.3515889  | 356.9969 |
| cg07640473 | SEMA3F   | 3  | 50168236  | 0.05431185 | 0.08233942 | 20.20564 | 0.08754704 | 14.39406 | 0.1178418  | 113.1692 |
| cg07651242 | ADCY1    | 7  | 45581245  | 0.0748084  | 0.1141327  | 33.74197 | 0.1117081  | 28.75271 | 0.1543588  | 140.0187 |
| cg07675169 | C2orf98  | 20 | 61356707  | 0.06474462 | 0.09010887 | 14.53176 | 0.08927295 | 13.17141 | 0.1101314  | 96.98413 |
| cg07684796 | DKF1     | 10 | 53741215  | 0.0501017  | 0.07184223 | 48.84223 | 0.0671469  | 29.35524 | 0.1486624  | 356.9969 |
| cg07703401 | HBOJ1    | 16 | 170341    | 0.0465196  | 0.06939889 | 13.65103 | 0.07078964 | 15.85138 | 0.1141153  | 134.2318 |
| cg07752420 | CDKN2A   | 9  | 21958681  | 0.1012669  | 0.134247   | 18.45938 | 0.1347876  | 22.09069 | 0.1998476  | 356.9969 |
| cg07758904 | TSCOT    | 9  | 114692645 | 0.04836053 | 0.08842975 | 45.4133  | 0.09500159 | 60.28767 | 0.1196622  | 356.9969 |
| cg07846220 | LAMA1    | 18 | 7107680   | 0.04570708 | 0.123113   | 34.56589 | 0.09070771 | 74.93978 | 0.1212963  | 356.9969 |
| cg07851192 | KCNK2    | 18 | 75725901  | 0.8960943  | 0.9241205  | 26.52876 | 0.917299   | 13.00637 | 0.9576307  | 77.48681 |
| cg07935568 | MLL2     | 20 | 4892123   | 0.0501191  | 0.0711191  | 36.74455 | 0.0716489  | 25.9354  | 0.1991481  | 356.9969 |
| cg08023692 | TDFP3    | X  | 132179880 | 0.7867126  | 0.8319894  | 31.05233 | 0.831883   | 30.07281 | 0.8292844  | 32.36753 |
| cg08072716 | GPR62    | 3  | 51964732  | 0.4736551  | 0.5379738  | 28.75278 | 0.5227023  | 14.98523 | 0.5565724  | 58.4246  |
| cg08109815 | NMBR     | 6  | 142451524 | 0.2374444  | 0.2841865  | 19.13772 | 0.2855275  | 19.95094 | 0.3442705  | 120.847  |
| cg08185241 | GUS2     | 1  | 207915487 | 0.09742521 | 0.189223   | 34.53589 | 0.1727392  | 101.0091 | 0.2656181  | 356.9969 |
| cg08185661 | SYT19    | 11 | 7230704   | 0.0580827  | 0.1167633  | 93.28715 | 0.1299026  | 34.93717 | 0.2177014  | 356.9969 |
| cg08198362 | HRV3     | 20 | 6922104   | 0.06291445 | 0.07227393 | 48.71553 | 0.03722723 | 46.07716 | 0.1311021  | 356.9969 |
| cg08209133 | SLC10A4  | 4  | 18160381  | 0.1544539  | 0.235259   | 85.28098 | 0.2296252  | 73.54063 | 0.2832149  | 356.9969 |
| cg08261094 | SFRP4    | 7  | 37922801  | 0.05705294 | 0.08414686 | 18.24109 | 0.08106567 | 13.64333 | 0.1230521  | 118.1345 |
| cg08319591 | UCHL1    | 4  | 40954040  | 0.03038003 | 0.05676849 | 25.99688 | 0.05618827 | 22.01959 | 0.1028829  | 356.9969 |
| cg08321346 | ANKMY1   | 2  | 241145656 | 0.178975   | 0.2641126  | 80.5152  | 0.2637741  | 83.78105 | 0.3576872  | 356.9969 |
| cg08328671 | BKBR2    | 14 | 95741015  | 0.06032842 | 0.08768418 | 17.95468 | 0.08532031 | 14.36257 | 0.1114226  | 72.97694 |
| cg08349906 | FLJ3599  | 16 | 1539465   | 0.1428346  | 0.2262349  | 48.78459 | 0.1286149  | 15.76140 | 0.2449201  | 356.9969 |
| cg08393029 | CDKN2B   | 9  | 21958683  | 0.1288329  | 0.1718689  | 26.64746 | 0.1685419  | 18.68245 | 0.2187174  | 131.9527 |
| cg08422999 | KCNIP1   | 5  | 169863670 | 0.03760169 | 0.06222336 | 16.68995 | 0.05903652 | 13.40666 | 0.08435335 | 76.94466 |
| cg08432727 | SOX11    | 2  | 5749173   | 0.08192493 | 0.134606   | 57.35492 | 0.1214256  | 31.08693 | 0.2115536  | 356.9969 |
| cg08441170 | MYO3A    | 10 | 26263106  | 0.04120277 | 0.09150114 | 75.83916 | 0.08337194 | 53.30772 | 0.159198   | 356.9969 |
| cg08441806 | NKX6-2   | 10 | 134449139 | 0.1599098  | 0.2861443  | 34.53589 | 0.2472436  | 95.97541 | 0.3543873  | 356.9969 |
| cg08451957 | FOXO4L1  | 2  | 113972876 | 0.5389013  | 0.6024269  | 29.22349 | 0.5444458  | 20.73699 | 0.6416287  | 96.69946 |
| cg08487211 | ACTL16   | 7  | 108407918 | 0.10400918 | 0.13940718 | 85.77991 | 0.08865756 | 51.78892 | 0.1787105  | 356.9969 |
| cg08575537 | EPO      | 7  | 100156562 | 0.1574308  | 0.2563035  | 25.38232 | 0.2487243  | 105.9037 | 0.3551106  | 356.9969 |
| cg08586737 | GCC1     | 7  | 127013185 | 0.2841924  | 0.3401739  | 124.9512 | 0.3305798  | 16.07162 | 0.3702609  | 71.58888 |
| cg08642068 | SPAG4L   | 20 | 31055437  | 0.04027171 | 0.0562812  | 82.42902 | 0.4629599  | 24.13297 | 0.5764878  | 356.9969 |
| cg08668790 | ZNF154   | 19 | 62912474  | 0.05196012 | 0.09656136 | 54.10553 | 0.07750574 | 16.68808 | 0.1281489  | 356.9969 |
| cg08731300 | PZD8     | 10 | 35970331  | 0.02982623 | 0.06000705 | 33.49139 | 0.05429116 | 19.95094 | 0.0626218  | 115.789  |
| cg08789421 | GNAQ     | 9  | 7295194   | 0.08114643 | 0.10848162 | 48.84223 | 0.08640619 | 28.68669 | 0.1346558  | 356.9969 |
| cg08811702 | FP96A012 | 4  | 41058077  | 0.02818232 | 0.05285692 | 21.22748 | 0.05059912 | 16.93452 | 0.08011944 | 102.0996 |
| cg08849574 | ZNF134   | 19 | 62817765  | 0.07164455 | 0.1046237  | 23.94422 | 0.1085124  | 29.52559 | 0.1389004  | 108.8882 |
| cg08900043 | HOXC10   | 12 | 52665163  | 0.04951442 | 0.07282063 | 14.29139 | 0.07476718 | 16.71948 | 0.1088695  | 104.6904 |
| cg09030119 | ZNF285   | 19 | 49997183  | 0.1639332  | 0.2276478  | 90.743   |            |          |            |          |

|            |          |    |           |            |            |          |            |          |            |          |
|------------|----------|----|-----------|------------|------------|----------|------------|----------|------------|----------|
| cg11102782 | ISYNA1   | 19 | 18410136  | 0.08883338 | 0.1254266  | 25.59518 | 0.117963   | 15.23449 | 0.1451777  | 69.83736 |
| cg11126134 | FLJ1934  | 13 | 30373031  | 0.092923   | 0.179234   | 345.9589 | 0.174709   | 120.1572 | 0.224711   | 356.9989 |
| cg11260422 | FOXA1    | 14 | 37133863  | 0.05027954 | 0.08576707 | 34.75447 | 0.07627659 | 17.64427 | 0.1170584  | 127.4081 |
| cg11279021 | ETV1     | 7  | 13959215  | 0.09063222 | 0.1455996  | 41.13561 | 0.1312746  | 18.83208 | 0.1534848  | 63.66089 |
| cg11323198 | CDH8     | 16 | 60627307  | 0.05906153 | 0.09405243 | 30.77613 | 0.08999724 | 23.09327 | 0.1292515  | 129.0572 |
| cg11368643 | PCDH15   | 5  | 140605243 | 0.1577149  | 0.204044   | 26.59616 | 0.2058766  | 28.18463 | 0.2610503  | 156.9989 |
| cg11376198 | AFAR3    | 1  | 19473317  | 0.2476481  | 0.2891927  | 14.17465 | 0.2882534  | 13.13234 | 0.3527001  | 114.2849 |
| cg11377136 | PKDREJ   | 22 | 44597624  | 0.1995105  | 0.3059626  | 345.9589 | 0.3110105  | 343.9177 | 0.4627133  | 356.9989 |
| cg11389172 | SLC18A3  | 10 | 50483043  | 0.02480333 | 0.04863306 | 22.21824 | 0.0456419  | 14.84019 | 0.104216   | 356.9989 |
| cg11428724 | PAX7     | 1  | 18830219  | 0.04533434 | 0.0700859  | 17.15441 | 0.07705037 | 28.32843 | 0.1179391  | 356.9989 |
| cg11438428 | PTF1A    | 10 | 23521600  | 0.05908795 | 0.09429611 | 31.14947 | 0.08740824 | 19.19021 | 0.1258569  | 356.9989 |
| cg11492856 | CAPN7    | 3  | 15221591  | 0.8414139  | 0.8702374  | 15.6922  | 0.8746538  | 21.77221 | 0.8776724  | 33.26476 |
| cg11584690 | ZNF574   | 19 | 47268036  | 0.2300278  | 0.3017989  | 50.12183 | 0.2854448  | 27.91789 | 0.3380983  | 126.8071 |
| cg11594137 | EDG3     | 9  | 90795801  | 0.1286049  | 0.196869   | 73.35222 | 0.1755427  | 31.60928 | 0.2170284  | 125.5542 |
| cg11612345 | SMOC2    | 6  | 165858304 | 0.09041307 | 0.136209   | 40.47233 | 0.1186656  | 14.05264 | 0.1970719  | 356.9989 |
| cg11668844 | MCF2L    | 13 | 112703623 | 0.07876197 | 0.1408604  | 80.74265 | 0.1245558  | 43.32532 | 0.1348304  | 74.56334 |
| cg11688923 | ADAM12   | 10 | 12806926  | 0.04288305 | 0.09049922 | 67.05535 | 0.08336229 | 48.0083  | 0.1463263  | 356.9989 |
| cg11732619 | SLIT3    | 5  | 168660654 | 0.03496702 | 0.07090076 | 42.40217 | 0.06594132 | 30.52433 | 0.1159453  | 356.9989 |
| cg11743470 | GCNT4    | 5  | 74363033  | 0.6497946  | 0.7134263  | 37.21424 | 0.7209092  | 47.12486 | 0.696525   | 21.53979 |
| cg11810837 | ARMCX5   | X  | 101740932 | 0.2402017  | 0.2829399  | 15.5099  | 0.2912102  | 22.4903  | 0.2779361  | 15.3995  |
| cg11832722 | DSC3     | 18 | 28577038  | 0.06864729 | 0.1366296  | 105.2228 | 0.1307243  | 37.09701 | 0.2364209  | 356.9989 |
| cg11846956 | KLK10    | 19 | 56212194  | 0.04029432 | 0.08905146 | 72.14037 | 0.06934632 | 25.00456 | 0.1243956  | 356.9989 |
| cg11934695 | ADRA1D   | 20 | 4178092   | 0.05003598 | 0.08856    | 41.13561 | 0.07696894 | 19.03799 | 0.1318201  | 356.9989 |
| cg11935147 | PDE4DIP  | 1  | 143787188 | 0.1183079  | 0.1604774  | 27.63494 | 0.1486269  | 13.13561 | 0.1981331  | 110.1242 |
| cg11946503 | NEUROG1  | 5  | 134898413 | 0.05441752 | 0.09038914 | 34.20336 | 0.08122637 | 17.97828 | 0.116345   | 108.0867 |
| cg11965370 | HNT      | 11 | 131286156 | 0.06431555 | 0.1413124  | 345.9589 | 0.1264056  | 90.04905 | 0.208744   | 356.9989 |
| cg11981999 | GATA4    | 8  | 11605935  | 0.0872967  | 0.1543213  | 58.21478 | 0.1721455  | 43.29659 | 0.2118614  | 356.9989 |
| cg11983754 | ERBB2    | 17 | 35110039  | 0.1541416  | 0.2173639  | 52.35905 | 0.2070746  | 35.13463 | 0.2838505  | 356.9989 |
| cg12024906 | HKR1     | 19 | 42517519  | 0.337298   | 0.4573107  | 118.2765 | 0.4470002  | 96.55791 | 0.5048913  | 356.9989 |
| cg12044689 | HIALT1   | 9  | 96243178  | 0.8904812  | 0.920314   | 28.78044 | 0.9135641  | 14.92927 | 0.9120293  | 16.85268 |
| cg12078929 | SERHL    | 22 | 41226632  | 0.03143178 | 0.05564856 | 19.50598 | 0.06297284 | 13.10307 | 0.1185829  | 356.9989 |
| cg12111714 | ATP2A2   | 13 | 24941472  | 0.2087997  | 0.3085012  | 104.7582 | 0.2862239  | 32.62358 | 0.4107092  | 356.9989 |
| cg12128017 | EPHA10   | 1  | 38093356  | 0.05688337 | 0.08931569 | 34.24171 | 0.06188319 | 16.8595  | 0.132285   | 356.9989 |
| cg12163132 | TBX2     | 17 | 56830699  | 0.2771434  | 0.3411491  | 34.24171 | 0.3239591  | 16.68967 | 0.3385474  | 37.18181 |
| cg12163490 | CDH11    | 16 | 63713342  | 0.06449824 | 0.1348903  | 114.6034 | 0.1246142  | 64.58897 | 0.2373656  | 356.9989 |
| cg12164282 | PXDN     | 2  | 1727119   | 0.06486631 | 0.1698266  | 345.9589 | 0.1471305  | 343.9177 | 0.2765905  | 356.9989 |
| cg12259537 | TRAF6    | 19 | 63206506  | 0.07588945 | 0.1068673  | 20.09995 | 0.1170196  | 35.61578 | 0.1319625  | 76.18723 |
| cg12277666 | TDRD5    | 1  | 177827493 | 0.1036388  | 0.1572827  | 50.74343 | 0.1625388  | 60.1588  | 0.218145   | 356.9989 |
| cg12300353 | KCTD8    | 4  | 44144175  | 0.02949806 | 0.04914836 | 14.93491 | 0.0387939  | 13.78917 | 0.07527964 | 121.7181 |
| cg12313389 | RBPA     | 10 | 95350726  | 0.03262874 | 0.07269342 | 54.11488 | 0.0626537  | 37.13822 | 0.120729   | 356.9989 |
| cg12373771 | CECR6    | 22 | 15981381  | 0.05362022 | 0.0855722  | 47.08142 | 0.08857784 | 31.60928 | 0.1333308  | 356.9989 |
| cg12374721 | PRAC     | 17 | 44154639  | 0.08557584 | 0.114058   | 15.27193 | 0.1166461  | 18.13251 | 0.1822504  | 356.9989 |
| cg12420104 | DMRT3    | 9  | 967109    | 0.04803745 | 0.08028657 | 29.19058 | 0.08053535 | 28.91691 | 0.1306551  | 356.9989 |
| cg12424540 | CHGA     | 14 | 92459644  | 0.05173275 | 0.09595008 | 53.3099  | 0.09255621 | 44.30722 | 0.192654   | 356.9989 |
| cg12448933 | RAB37    | 17 | 70178873  | 0.0778945  | 0.1157534  | 30.50138 | 0.1066807  | 16.5477  | 0.1774274  | 356.9989 |
| cg12457173 | VIRP     | 6  | 24231416  | 0.2181014  | 0.1739425  | 41.03509 | 0.1739425  | 37.49029 | 0.251118   | 45.9309  |
| cg12459502 | BCL2     | 18 | 59055217  | 0.3855427  | 0.4023209  | 14.83554 | 0.4028552  | 14.81776 | 0.4766291  | 128.5149 |
| cg12497564 | RBP1     | 3  | 140740985 | 0.04408865 | 0.08806494 | 56.98462 | 0.09151608 | 65.29526 | 0.1601334  | 356.9989 |
| cg12563178 | PLXDC2   | 10 | 20145647  | 0.02542161 | 0.05474115 | 31.66888 | 0.04858431 | 18.86069 | 0.09455719 | 356.9989 |
| cg12582959 | HSTU9303 | 19 | 60851011  | 0.2146484  | 0.2885618  | 55.88121 | 0.2693102  | 28.65679 | 0.3349541  | 356.9989 |
| cg12649441 | MGC52057 | 2  | 149895469 | 0.07296348 | 0.205226   | 345.9589 | 0.189603   | 343.9177 | 0.2918105  | 356.9989 |
| cg12613383 | PLS1     | 1  | 24301496  | 0.1320196  | 0.1394441  | 27.55173 | 0.1394441  | 22.42526 | 0.2128508  | 37.61532 |
| cg12629325 | PCDHAC1  | 5  | 140286642 | 0.03160786 | 0.05409666 | 16.57333 | 0.05318932 | 14.81204 | 0.1141032  | 356.9989 |
| cg12645220 | PAK7     | 20 | 9767272   | 0.06117712 | 0.09516023 | 28.29187 | 0.09052525 | 20.29351 | 0.1387334  | 356.9989 |
| cg12756687 | DRD2     | 11 | 112851537 | 0.1121279  | 0.2175579  | 24.7316  | 0.2229116  | 30.54471 | 0.2581083  | 100.596  |
| cg12770741 | NXN      | 17 | 830526    | 0.5793966  | 0.6481642  | 37.52487 | 0.6302227  | 18.02371 | 0.7044937  | 356.9989 |
| cg12782180 | LFP      | 1  | 127688168 | 0.4800679  | 0.5771186  | 72.33786 | 0.5773281  | 72.37287 | 0.6661712  | 356.9989 |
| cg12799905 | APTX2    | 7  | 8952918   | 0.1320196  | 0.2582978  | 345.9589 | 0.1526891  | 343.9177 | 0.350226   | 356.9989 |
| cg12802039 | OCA2     | 15 | 28018007  | 0.09533465 | 0.128633   | 19.78532 | 0.1290263  | 19.84936 | 0.1511071  | 65.6167  |
| cg13067215 | CGI-38   | 16 | 65984786  | 0.1026862  | 0.1392231  | 22.82622 | 0.1350335  | 17.13896 | 0.1710344  | 90.86047 |
| cg13099330 | RBP1     | 3  | 140740489 | 0.09546445 | 0.1540962  | 63.84524 | 0.1394514  | 34.80608 | 0.2137867  | 356.9989 |
| cg13192155 | EKAS     | X  | 48570887  | 0.4796873  | 0.5580249  | 50.20751 | 0.5348353  | 22.90211 | 0.5791955  | 92.28996 |
| cg13265789 | UNC5C    | 4  | 96889607  | 0.04673636 | 0.07498578 | 24.03222 | 0.07399917 | 22.05113 | 0.1208737  | 356.9989 |
| cg13344740 | DLX3     | 7  | 9870495   | 0.1154025  | 0.1945923  | 48.3083  | 0.1154025  | 39.85831 | 0.203073   | 120.3383 |
| cg13384396 | ADCY5    | 3  | 12465367  | 0.1477752  | 0.1946098  | 28.77105 | 0.1809171  | 13.15087 | 0.2286104  | 97.26136 |
| cg13398291 | SFRP1    | 8  | 41285326  | 0.03010376 | 0.0619587  | 35.33081 | 0.0548807  | 20.44233 | 0.0952197  | 356.9989 |
| cg13434842 | GATA4    | 8  | 11605935  | 0.0872967  | 0.1543213  | 58.21478 | 0.2892488  | 61.42893 | 0.4263387  | 356.9989 |
| cg13435792 | C12orf46 | 12 | 14983701  | 0.5950412  | 0.6418314  | 15.54099 | 0.6450163  | 17.87691 | 0.6707441  | 55.40609 |
| cg13449778 | C1orf76  | 1  | 177978921 | 0.0296229  | 0.05602793 | 24.05112 | 0.05225755 | 16.94882 | 0.0836552  | 124.1072 |
| cg13460409 | DSGCR    | 21 | 3730146   | 0.11465    | 0.196457   | 16.10793 | 0.1872121  | 34.91177 | 0.213861   | 356.9989 |
| cg13488201 | ADAM12   | 10 | 12806923  | 0.07156545 | 0.1393748  | 100.8803 | 0.1228854  | 58.54298 | 0.2037331  | 356.9989 |
| cg13494498 | IUB33    | 16 | 89517115  | 0.0980083  | 0.1354987  | 25.00321 | 0.1394839  | 30.21458 | 0.1933047  | 356.9989 |
| cg13507893 | SLC5A4   | 22 | 30989907  | 0.7788707  | 0.8117031  | 13.53177 | 0.820027   | 22.83552 | 0.8134581  | 19.6207  |
| cg13573276 | RHDH2    | 8  | 57395452  | 0.05590152 | 0.09301198 | 35.94159 | 0.09617066 | 41.21438 | 0.1189683  | 110.2862 |
| cg13680777 | PDHA1    | X  | 19271661  | 0.3273658  | 0.37819    | 18.34501 | 0.3796937  | 19.16688 | 0.3796629  | 24.43568 |
| cg13723482 | HNRPH2   | X  | 10054835  | 0.4700635  | 0.5249385  | 19.24442 | 0.5250147  | 19.29894 | 0.5439888  | 41.33884 |
| cg13749822 | HNF1A    | 4  | 14578813  | 0.2298911  | 0.3298919  | 64.38778 | 0.311005   | 38.98778 | 0.489419   | 356.9989 |
| cg13759328 | CDH13    | 16 | 81219022  | 0.09172505 | 0.11935    | 13.5729  | 0.1193564  | 13.22614 | 0.1479961  | 68.3676  |
| cg13818573 | C1QL1    | 17 | 4040088   | 0.04930582 | 0.07212645 | 13.72405 | 0.07908062 | 23.72527 | 0.130674   | 356.9989 |
| cg13850625 | FLJ11155 | 4  | 159351140 | 0.02590884 | 0.04796845 | 17.24427 | 0.0488293  | 18.34015 | 0.08732279 | 104.0187 |
| cg13854874 | CHAF1B   | 21 | 36679395  | 0.1199319  | 0.161349   | 26.31451 | 0.1591788  | 22.87082 | 0.1852488  | 75.51215 |
| cg13870986 | TBAO2    | 7  | 35259655  | 0.1062319  | 0.1538973  | 39.03662 | 0.1396621  | 17.9709  | 0.1873211  | 121.0498 |
| cg13878010 | ADAM12   | 10 | 12806923  | 0.07156545 | 0.1393748  | 100.8803 | 0.1228854  | 22.85913 | 0.184076   | 356.9989 |
| cg13929328 | FLJ46831 | 10 | 12942588  | 0.09590609 | 0.1690333  | 97.44207 | 0.1552819  | 64.69043 | 0.2346433  | 356.9989 |
| cg13975369 | TSGA14   | 7  | 129697789 | 0.2774859  | 0.367963   | 71.53513 | 0.3829968  | 97.54069 | 0.4235652  | 356.9989 |
| cg13991029 | PAGES    | X  | 55263180  | 0.731548   | 0.7810711  | 28.1785  | 0.78737    | 36.58324 | 0.7784234  | 30.11581 |
| cg14008883 | SLC18A3  | 10 | 50489817  | 0.1441195  | 0.1812089  | 17.9999  | 0.1837608  | 22.27028 | 0.2662     |          |

|            |           |    |           |            |            |          |            |          |            |          |
|------------|-----------|----|-----------|------------|------------|----------|------------|----------|------------|----------|
| cg15774153 | FGF19     | 11 | 69227954  | 0.03369973 | 0.07328153 | 52.26048 | 0.0697495  | 21.65953 | 0.06787174 | 103.7107 |
| cg15812357 | VGY       | 4  | 74774774  | 0.4115333  | 0.5323794  | 335.9589 | 0.5163629  | 83.76105 | 0.530492   | 330.9398 |
| cg15842276 | MTNR1B    | 11 | 92342296  | 0.3412051  | 0.4256836  | 56.1222  | 0.4001059  | 24.4173  | 0.4649271  | 135.4341 |
| cg15898840 | IGFBP3    | 7  | 45927359  | 0.02877674 | 0.06975324 | 59.00882 | 0.0599714  | 33.47224 | 0.117112   | 356.9969 |
| cg15957394 | AFAP      | 4  | 7992723   | 0.06837831 | 0.1079244  | 36.21637 | 0.1097328  | 38.57236 | 0.178747   | 356.9969 |
| cg15988232 | CSPG5     | 3  | 47596131  | 0.4335866  | 0.5131325  | 45.9643  | 0.4915372  | 21.78839 | 0.5362911  | 89.5513  |
| cg16005224 | SLC5A8    | 12 | 10017305  | 0.4557788  | 0.5083321  | 17.75202 | 0.5039306  | 14.10088 | 0.5022569  | 17.33382 |
| cg16154416 | RASGRF1   | 15 | 77169222  | 0.1477336  | 0.2064665  | 46.44087 | 0.1942193  | 27.60219 | 0.257989   | 356.9969 |
| cg16204757 | MBN       | X  | 64803464  | 0.0498598  | 0.0498598  | 32.54855 | 0.4065058  | 33.6772  | 0.4189192  | 57.21453 |
| cg16232126 | SLC5A7    | 2  | 107969437 | 0.08662448 | 0.1448889  | 67.14854 | 0.1275146  | 32.14169 | 0.2020662  | 356.9969 |
| cg16254309 | CNTNAP2   | 7  | 145445085 | 0.06992172 | 0.1177977  | 52.62838 | 0.1127178  | 40.80559 | 0.1595777  | 356.9969 |
| cg16263182 | HBA2      | 16 | 1633399   | 0.0613284  | 0.0910058  | 21.18076 | 0.08652058 | 14.46173 | 0.1288219  | 118.6729 |
| cg16362283 | FAM46B    | 1  | 27211565  | 0.1694275  | 0.2332065  | 49.48766 | 0.2106471  | 18.93937 | 0.2687049  | 130.073  |
| cg16368080 | CCRK      | 9  | 89776965  | 0.2300702  | 0.2942426  | 39.42079 | 0.2809131  | 23.08831 | 0.3431803  | 137.0993 |
| cg16428251 | COX14     | 3  | 13998369  | 0.06904546 | 0.1183738  | 20.36776 | 0.1231582  | 26.30116 | 0.1674566  | 137.0993 |
| cg16483916 | PLAC2     | 19 | 5518758   | 0.1127935  | 0.1747767  | 63.4111  | 0.1675266  | 48.36425 | 0.2182314  | 356.9969 |
| cg16539629 | C14orf132 | 14 | 95575475  | 0.03882493 | 0.06616909 | 23.02646 | 0.07009233 | 29.67819 | 0.1195247  | 356.9969 |
| cg16547529 | FLJ33790  | 11 | 74818329  | 0.5516404  | 0.6667868  | 115.8496 | 0.6058288  | 20.0121  | 0.712817   | 356.9969 |
| cg16632715 | HOXD11    | 2  | 176680359 | 0.1127988  | 0.1730084  | 59.84668 | 0.1673671  | 48.11644 | 0.2262828  | 356.9969 |
| cg16636540 | ZNF135    | 19 | 63262280  | 0.1393397  | 0.2388162  | 345.9589 | 0.2097267  | 69.34833 | 0.3210882  | 356.9969 |
| cg16652063 | SLC15A5   | 7  | 65573719  | 0.0595419  | 0.09491597 | 31.30829 | 0.06550298 | 16.82593 | 0.1133525  | 80.81077 |
| cg16652259 | DLX1      | 2  | 172657747 | 0.05396351 | 0.08078027 | 18.4379  | 0.078488   | 14.81204 | 0.1088821  | 87.7657  |
| cg16713808 | CRNN      | 1  | 150654664 | 0.738628   | 0.7934793  | 37.34182 | 0.7940376  | 37.18185 | 0.78477    | 30.0386  |
| cg16731240 | ZNF577    | 19 | 57083062  | 0.1534855  | 0.2840474  | 345.9589 | 0.2532029  | 128.4647 | 0.3602605  | 356.9969 |
| cg16749578 | NR2F6     | 19 | 17218619  | 0.1093911  | 0.1517053  | 29.77497 | 0.1458562  | 21.11397 | 0.1738444  | 78.3372  |
| cg16773899 | EDL3      | 5  | 83716082  | 0.05364338 | 0.09080358 | 52.79683 | 0.09344615 | 41.20112 | 0.1571391  | 356.9969 |
| cg16792800 | GPC6      | 13 | 92877362  | 0.0709249  | 0.1089543  | 32.80515 | 0.1015798  | 20.35273 | 0.1649363  | 356.9969 |
| cg16853392 | ACTN2     | 1  | 234916012 | 0.2921671  | 0.3985465  | 79.32134 | 0.367019   | 45.39878 | 0.4510947  | 356.9969 |
| cg16872560 | PPP1R9A   | 7  | 94374922  | 0.03856385 | 0.06976552 | 30.47568 | 0.06462953 | 20.39497 | 0.1087682  | 356.9969 |
| cg16954341 | SCGN      | 6  | 25760360  | 0.1723322  | 0.2298988  | 39.37725 | 0.2115627  | 16.76478 | 0.2904806  | 356.9969 |
| cg17051321 | BNC1      | 15 | 81743512  | 0.08901338 | 0.132144   | 36.20604 | 0.1271667  | 27.19744 | 0.1597466  | 105.4747 |
| cg17063929 | NOX4      | 11 | 89864447  | 0.08621248 | 0.1207339  | 19.97196 | 0.1192029  | 17.64427 | 0.2031568  | 356.9969 |
| cg17162024 | UNG9433   | 8  | 53941007  | 0.05328921 | 0.08598929 | 28.48444 | 0.08352978 | 23.61001 | 0.1186012  | 113.7886 |
| cg17214310 | BARHL2    | 1  | 90955444  | 0.06803735 | 0.1164382  | 54.57645 | 0.1033104  | 27.86186 | 0.1710591  | 356.9969 |
| cg17252960 | IDA       | 6  | 19945329  | 0.0833739  | 0.1302395  | 44.92355 | 0.1227679  | 30.54471 | 0.2025448  | 356.9969 |
| cg17279839 | RARRES2   | 7  | 149696531 | 0.1479128  | 0.1839553  | 16.22059 | 0.2060327  | 44.25017 | 0.2401309  | 123.8677 |
| cg17301902 | GNA14     | 9  | 79453039  | 0.07564978 | 0.1079457  | 22.05272 | 0.102101   | 13.8894  | 0.1365319  | 88.55333 |
| cg17398595 | SH3GL2    | 9  | 17568725  | 0.1753643  | 0.2288028  | 33.12933 | 0.2192984  | 21.15136 | 0.2939643  | 356.9969 |
| cg17410236 | FLRT2     | 14 | 89066248  | 0.02610268 | 0.05910921 | 27.52581 | 0.05735542 | 34.79871 | 0.1039861  | 356.9969 |
| cg17433778 | CTSL      | 3  | 12335359  | 0.1794059  | 0.2455318  | 51.00735 | 0.2245634  | 21.98591 | 0.2921646  | 356.9969 |
| cg17457560 | NRG1      | 8  | 32525393  | 0.05381725 | 0.1168847  | 102.4547 | 0.1071936  | 74.53156 | 0.1688376  | 356.9969 |
| cg17469479 | CLEC9A    | 12 | 10074475  | 0.7317499  | 0.7839147  | 31.99341 | 0.7868487  | 13.48962 | 0.8166654  | 111.5354 |
| cg17524886 | CHFR      | 12 | 131934782 | 0.8900114  | 0.9203255  | 29.80188 | 0.9318005  | 64.40411 | 0.9416711  | 118.4928 |
| cg17527798 | LTF       | 3  | 46481408  | 0.06676365 | 0.10725    | 38.56841 | 0.09452147 | 16.9684  | 0.1456931  | 356.9969 |
| cg17619823 | ADRB3     | 8  | 37942652  | 0.02440387 | 0.05466026 | 34.73588 | 0.0530196  | 29.74105 | 0.1098552  | 356.9969 |
| cg17641252 | PLI14     | 14 | 6394149   | 0.6381969  | 0.6910536  | 40.15332 | 0.6911985  | 35.63033 | 0.7278923  | 356.9969 |
| cg17655614 | CDH11     | 16 | 67328445  | 0.3146394  | 0.4038585  | 64.93621 | 0.3715039  | 23.62148 | 0.5051605  | 356.9969 |
| cg17685628 | NKX2-8    | 14 | 36121444  | 0.08645626 | 0.1207248  | 22.71526 | 0.1279929  | 33.21061 | 0.1927116  | 356.9969 |
| cg17688525 | L3MBTL4   | 18 | 6404878   | 0.07040666 | 0.227825   | 345.9589 | 0.2237362  | 343.9177 | 0.3733433  | 356.9969 |
| cg17710021 | GOS2      | 1  | 207915200 | 0.04537325 | 0.08341502 | 42.19709 | 0.07014988 | 16.8329  | 0.1252441  | 356.9969 |
| cg17729687 | KIAA0980  | 20 | 25514382  | 0.06873226 | 0.1082359  | 36.03346 | 0.1109747  | 40.15788 | 0.1665182  | 356.9969 |
| cg17731300 | C10orf146 | 15 | 19129596  | 0.0513124  | 0.0523291  | 40.29155 | 0.05707819 | 27.42124 | 0.1231414  | 356.9969 |
| cg17861230 | PDE4C     | 19 | 18204901  | 0.1741725  | 0.3264658  | 345.9589 | 0.3071734  | 343.9177 | 0.4622221  | 356.9969 |
| cg17977362 | FLJ45964  | 2  | 240165186 | 0.783378   | 0.8828782  | 345.9589 | 0.8877767  | 343.9177 | 0.8237365  | 28.23983 |
| cg17977409 | SH3GL2    | 9  | 17569227  | 0.05097378 | 0.1312992  | 345.9589 | 0.125124   | 343.9177 | 0.2070601  | 356.9969 |
| cg18005568 | FLJ12056  | 2  | 71059399  | 0.1883881  | 0.2443283  | 34.44209 | 0.2536225  | 46.4849  | 0.3141074  | 356.9969 |
| cg18023724 | LOC62945  | 4  | 184307943 | 0.8284998  | 0.8980588  | 14.92718 | 0.8874448  | 28.62177 | 0.8902526  | 22.46576 |
| cg18162399 | DIG3      | 2  | 21959925  | 0.0619881  | 0.0917439  | 98.25542 | 0.1174399  | 88.22639 | 0.3119359  | 356.9969 |
| cg18236477 | ATP8A2    | 13 | 24341066  | 0.1089019  | 0.1855132  | 68.01582 | 0.1760242  | 75.48888 | 0.2864084  | 356.9969 |
| cg18239753 | KHDRBS2   | 6  | 63053922  | 0.08026583 | 0.1315759  | 55.19077 | 0.1147009  | 23.64015 | 0.1868215  | 356.9969 |
| cg18267374 | NEF3      | 8  | 24827178  | 0.02368456 | 0.04813472 | 22.17979 | 0.0444015  | 15.1711  | 0.1161557  | 356.9969 |
| cg18267381 | ZNF859    | 3  | 21767438  | 0.2119138  | 0.2989892  | 78.82233 | 0.2753665  | 39.89966 | 0.3211691  | 135.4341 |
| cg18420965 | EPHA5     | 4  | 66217740  | 0.06255709 | 0.1049819  | 44.1545  | 0.09987674 | 32.1513  | 0.1413838  | 356.9969 |
| cg18438777 | NPAS2     | 4  | 16454325  | 0.06178985 | 0.1021628  | 34.6395  | 0.110178   | 25.0202  | 0.1570896  | 356.9969 |
| cg18454685 | CACNA1G   | 17 | 45984238  | 0.02959117 | 0.05204444 | 17.11026 | 0.07095984 | 82.89059 | 0.1039661  | 356.9969 |
| cg18511007 | COL1A2    | 7  | 93861758  | 0.05766522 | 0.08803389 | 23.16782 | 0.09013446 | 25.95798 | 0.1108305  | 80.18781 |
| cg18536148 | IBX4      | 17 | 58888626  | 0.07223019 | 0.1210231  | 53.47853 | 0.1031498  | 20.29945 | 0.1435124  | 120.1278 |
| cg18555440 | MYO11     | 11 | 16907481  | 0.1061176  | 0.1743685  | 79.87895 | 0.1571760  | 43.77993 | 0.2097948  | 356.9969 |
| cg18575221 | C14orf162 | 14 | 67189283  | 0.6894953  | 0.7294262  | 13.9797  | 0.7308642  | 14.84031 | 0.73055    | 19.18946 |
| cg18630040 | PLAG2     | 6  | 4621492   | 0.0539234  | 0.05297011 | 45.19193 | 0.04374632 | 24.20259 | 0.09454737 | 356.9969 |
| cg18676162 | NME1      | 16 | 3686885   | 0.03478105 | 0.0565524  | 13.95694 | 0.05882175 | 13.42484 | 0.08790869 | 68.15943 |
| cg18691434 | GPC2      | 7  | 996133601 | 0.06925257 | 0.118233   | 55.23933 | 0.1294272  | 81.55394 | 0.2026     | 99.9929  |
| cg18705301 | NDUFAF1   | 15 | 39482722  | 0.5458303  | 0.5931242  | 14.71739 | 0.5949181  | 15.72374 | 0.6450871  | 90.79116 |
| cg18717300 | RHOJ      | 14 | 62741490  | 0.4642134  | 0.60325    | 345.9589 | 0.5963703  | 343.9177 | 0.6382324  | 356.9969 |
| cg18809289 | ALOX5     | 10 | 45189822  | 0.1470618  | 0.1933779  | 28.22877 | 0.1952241  | 33.0288  | 0.2584025  | 356.9969 |
| cg18815943 | FOXJ3     | 1  | 47654901  | 0.02621263 | 0.07373484 | 80.46931 | 0.08156295 | 105.4582 | 0.1796089  | 356.9969 |
| cg18828296 | PCDHAC1   | 5  | 14828283  | 0.94846738 | 0.9824763  | 45.58182 | 0.9416848  | 28.62268 | 0.7683821  | 356.9969 |
| cg19014419 | ZNF300    | 5  | 150264697 | 0.1785119  | 0.2377017  | 40.55902 | 0.2145618  | 13.36375 | 0.2745852  | 118.2321 |
| cg19064258 | HS3ST2    | 16 | 22733618  | 0.100765   | 0.151178   | 45.55486 | 0.1517381  | 45.43853 | 0.2416038  | 356.9969 |
| cg19064675 | ASAM      | 11 | 122571739 | 0.06482343 | 0.09361577 | 19.13737 | 0.1011637  | 30.57314 | 0.130584   | 110.361  |
| cg19162158 | NRG1      | 8  | 32524969  | 0.0185836  | 0.04235419 | 22.50198 | 0.04228819 | 21.84576 | 0.1167776  | 356.9969 |
| cg19211800 | MARCKS    | 6  | 114285706 | 0.03319719 | 0.0560686  | 35.37486 | 0.05897644 | 21.3286  | 0.1007562  | 356.9969 |
| cg19229259 | PFPR1A    | 3  | 94375283  | 0.05182514 | 0.04351574 | 34.58618 | 0.04168484 | 28.06912 | 0.3852297  | 356.9969 |
| cg19283196 | SLC10A4   | 4  | 48179990  | 0.1033425  | 0.1372075  | 19.12618 | 0.1322201  | 13.22814 | 0.1762425  | 40.33115 |
| cg19352038 | PAX3      | 2  | 222873113 | 0.1287681  | 0.1977949  | 71.25552 | 0.1740043  | 29.21289 | 0.2632359  | 356.9969 |
| cg19461621 | COLEC12   | 18 | 490979    | 0.0449097  | 0.07167938 | 20.25038 | 0.07472708 | 24.84343 | 0.1047159  | 110.2816 |
| cg19502744 | SRD5A2    | 2  | 31659419  | 0.1377448  | 0.1986899  | 52.97828 | 0.1927478  | 4        |            |          |



|             |           |    |           |            |            |          |            |          |            |          |
|-------------|-----------|----|-----------|------------|------------|----------|------------|----------|------------|----------|
| cg21237418  | RAB34     | 17 | 24069170  | 0.184196   | 0.2595798  | 65.15487 | 0.2326114  | 24.98102 | 0.2838749  | 124.0274 |
| cg2123818   | GAL3      | 11 | 6557321   | 0.074616   | 0.133333   | 84.97689 | 0.1131349  | 38.03413 | 0.1918929  | 356.9969 |
| cg21269934  | FLJ34748  | 4  | 2030017   | 0.0378377  | 0.06087818 | 16.10765 | 0.07079469 | 33.44721 | 0.1052016  | 356.9969 |
| cg21296230  | GREM1     | 15 | 30797828  | 0.07405682 | 0.1529872  | 129.6118 | 0.1417784  | 97.61829 | 0.236622   | 356.9969 |
| cg21303011  | THR8      | 3  | 24512181  | 0.02069264 | 0.05316691 | 41.49623 | 0.05043947 | 33.86026 | 0.1176509  | 356.9969 |
| cg21303386  | RGS7      | 1  | 239506834 | 0.0776526  | 0.1692346  | 345.9589 | 0.1758729  | 343.9177 | 0.2853247  | 356.9969 |
| cg21363706  | NAT1      | 8  | 18110765  | 0.8467598  | 0.8812652  | 25.63313 | 0.8855257  | 30.20182 | 0.8810232  | 30.89814 |
| cg21376883  | ACTN2     | 1  | 23491855  | 0.1532003  | 0.2080259  | 39.0036  | 0.2188108  | 55.52134 | 0.3284453  | 356.9969 |
| cg21419391  | ISL1      | 5  | 50714208  | 0.08510042 | 0.1284147  | 37.70311 | 0.13301769 | 45.30483 | 0.1866084  | 356.9969 |
| cg21416022  | TTCC23    | 15 | 97607184  | 0.09941596 | 0.1419882  | 32.46465 | 0.1636848  | 73.94561 | 0.1517658  | 56.72669 |
| cg21458907  | CADPS3    | 3  | 62835842  | 0.03480712 | 0.06187805 | 23.71162 | 0.06218524 | 23.65803 | 0.0949764  | 122.8476 |
| cg21494776  | ICAM4     | 19 | 10258780  | 0.1184758  | 0.2023194  | 110.172  | 0.1832564  | 66.22165 | 0.2559797  | 356.9969 |
| cg21504918  | GPX3      | 5  | 150380194 | 0.07734953 | 0.1100431  | 22.26206 | 0.1070046  | 17.68744 | 0.1436047  | 101.7426 |
| cg21530890  | SOX8      | 16 | 97221     | 0.03545154 | 0.0786781  | 60.54193 | 0.06619155 | 29.8739  | 0.1583306  | 356.9969 |
| cg21535396  | FAM38B    | 21 | 11818075  | 0.03089519 | 0.05961316 | 28.66731 | 0.06159305 | 32.05698 | 0.1028266  | 356.9969 |
| cg21589115  | DKKL1     | 19 | 54558926  | 0.09679645 | 0.1504859  | 53.26154 | 0.1342691  | 24.59435 | 0.175003   | 120.0639 |
| cg215891742 | HOXD10    | 2  | 176689244 | 0.1259341  | 0.1648042  | 22.05732 | 0.1611794  | 17.4704  | 0.2060453  | 106.4068 |
| cg21604042  | SCUBE3    | 6  | 35289379  | 0.0997154  | 0.16299    | 71.89789 | 0.1418515  | 30.80175 | 0.1832746  | 132.5897 |
| cg21643045  | CCL20     | 2  | 228389937 | 0.8786342  | 0.9025771  | 17.32191 | 0.9047347  | 20.64828 | 0.9187099  | 64.02834 |
| cg21755709  | C21orf124 | 21 | 43973826  | 0.6321381  | 0.6939328  | 32.99706 | 0.6778232  | 51.17173 | 0.6711658  | 14.99534 |
| cg21787291  | TGFB1     | 6  | 12416869  | 0.0129442  | 0.0344928  | 19.84558 | 0.0358485  | 22.22721 | 0.0485734  | 62.97253 |
| cg21801378  | BRUNOL6   | 15 | 70399179  | 0.03380692 | 0.09111544 | 104.332  | 0.08408723 | 81.50842 | 0.1877008  | 356.9969 |
| cg21870668  | SNRPN     | 15 | 22674824  | 0.2832625  | 0.3438029  | 29.8134  | 0.3828972  | 85.85447 | 0.4191238  | 356.9969 |
| cg21870884  | GPR25     | 1  | 199109052 | 0.2790672  | 0.3993272  | 129.6118 | 0.3934104  | 117.7622 | 0.4937053  | 356.9969 |
| cg21992250  | SLC15A3   | 11 | 60475285  | 0.1288625  | 0.1926788  | 61.01486 | 0.1895244  | 54.15601 | 0.2537051  | 356.9969 |
| cg22020380  | RAB32     | 6  | 146909626 | 0.08380377 | 0.1173698  | 22.21824 | 0.1201984  | 25.71902 | 0.1630853  | 133.3159 |
| cg22034129  | SGD142    | 18 | 41448480  | 0.7429246  | 0.7987942  | 40.20344 | 0.785874   | 28.7503  | 0.7831969  | 23.01269 |
| cg22131691  | PDE1C     | 7  | 32077513  | 0.04013339 | 0.062629   | 14.83502 | 0.0631726  | 15.26295 | 0.09471236 | 98.58573 |
| cg22165175  | KCNA2     | 1  | 110950438 | 0.1462682  | 0.1889342  | 23.75236 | 0.1879526  | 21.66305 | 0.23454    | 115.2287 |
| cg22189519  | CDC37L1   | 9  | 4658226   | 0.7689782  | 0.8101371  | 22.05732 | 0.8113733  | 25.49688 | 0.7998919  | 14.58581 |
| cg22380033  | GRB14     | 2  | 165186164 | 0.02886731 | 0.05465528 | 23.14495 | 0.05198592 | 17.96319 | 0.09312766 | 356.9969 |
| cg22407458  | TOP11     | 6  | 35217059  | 0.0314136  | 0.07409967 | 61.92524 | 0.05931046 | 25.65975 | 0.113134   | 356.9969 |
| cg22418909  | SFRP1     | 8  | 41285895  | 0.09277031 | 0.1529727  | 65.45002 | 0.150859   | 62.69603 | 0.0839976  | 356.9969 |
| cg22485810  | CEN2A2    | 17 | 26272851  | 0.08085564 | 0.1194887  | 30.75604 | 0.10753    | 13.45493 | 0.1372525  | 74.11271 |
| cg22524514  | CSF1      | 11 | 65536252  | 0.202532   | 0.2429368  | 15.79858 | 0.2584737  | 31.49669 | 0.3070555  | 127.6077 |
| cg22578204  | TIMP3     | 22 | 31527952  | 0.05073187 | 0.0980799  | 61.409   | 0.07742833 | 18.53802 | 0.1279842  | 356.9969 |
| cg22598028  | ZNF660    | 3  | 44601496  | 0.04274432 | 0.07534182 | 32.41668 | 0.07175168 | 24.77024 | 0.1152326  | 356.9969 |
| cg22605578  | LHX1      | 17 | 32368142  | 0.06427442 | 0.1173569  | 67.22607 | 0.1099047  | 46.8976  | 0.1671476  | 356.9969 |
| cg22709192  | HOXD11    | 12 | 58265376  | 0.1036959  | 0.1658493  | 46.74808 | 0.1328845  | 18.53853 | 0.1815483  | 114.4444 |
| cg22719523  | OPRM1     | 6  | 154402425 | 0.3589042  | 0.4153286  | 22.13273 | 0.4185029  | 22.64054 | 0.4771343  | 122.13   |
| cg22736354  | NHLRC1    | 6  | 18230698  | 0.1134345  | 0.2373797  | 345.9589 | 0.2551775  | 343.9177 | 0.3489992  | 356.9969 |
| cg22752533  | SLC12A5   | 20 | 44091355  | 0.3123038  | 0.3657894  | 21.18076 | 0.3656523  | 20.6246  | 0.4819823  | 356.9969 |
| cg22754447  | IMPACT    | 18 | 20260314  | 0.07303438 | 0.1124002  | 34.34933 | 0.1014254  | 16.76478 | 0.1414424  | 111.1706 |
| cg22799132  | TRPC5     | X  | 111212151 | 0.1877443  | 0.2263463  | 15.24077 | 0.2306655  | 26.7503  | 0.2674977  | 80.4641  |
| cg22816110  | FOXD3     | 1  | 63561261  | 0.04850669 | 0.08905841 | 54.22646 | 0.09386538 | 65.81715 | 0.151741   | 356.9969 |
| cg22833229  | EFCA9     | 9  | 49811409  | 0.0529277  | 0.0911051  | 22.21479 | 0.10521    | 30.80217 | 0.1170073  | 121.9989 |
| cg23037403  | ZNF454    | 5  | 178300789 | 0.103441   | 0.1607412  | 57.76059 | 0.1419186  | 24.71171 | 0.2058608  | 356.9969 |
| cg23089840  | LRRCC3    | 21 | 44699314  | 0.1350539  | 0.188493   | 40.97071 | 0.1843338  | 33.66385 | 0.2932739  | 356.9969 |
| cg23095584  | GBX2      | 2  | 236742443 | 0.1437448  | 0.1884774  | 26.665   | 0.1805686  | 17.09874 | 0.2313557  | 114.9747 |
| cg23130254  | HOXD12    | 2  | 176672834 | 0.06770161 | 0.1085743  | 38.99382 | 0.1008031  | 24.44071 | 0.1729039  | 356.9969 |
| cg23154064  | C6orf63   | 3  | 56674186  | 0.7142479  | 0.7676315  | 31.14447 | 0.7689883  | 32.19146 | 0.7629988  | 30.44825 |
| cg23198531  | COL11A3   | 9  | 12182015  | 0.0521051  | 0.09112051 | 29.55942 | 0.09143269 | 19.45229 | 0.1201897  | 15.69036 |
| cg23207990  | SFRP2     | 4  | 154929885 | 0.05228292 | 0.07935898 | 19.15416 | 0.07687505 | 15.1782  | 0.1065211  | 87.07372 |
| cg23211240  | BTG4      | 11 | 110888834 | 0.06807178 | 0.1370189  | 107.0111 | 0.1252913  | 74.92707 | 0.1972143  | 356.9969 |
| cg23290344  | NEF3      | 8  | 24827371  | 0.0402549  | 0.09183963 | 80.32346 | 0.08695621 | 66.03104 | 0.2019625  | 356.9969 |
| cg23303408  | POU4F3    | 5  | 145698970 | 0.07980057 | 0.1116026  | 20.49438 | 0.1068552  | 14.03509 | 0.1510091  | 113.7042 |
| cg23316390  | EDMR8     | 13 | 77399917  | 0.09668125 | 0.08800273 | 21.31494 | 0.09101699 | 25.56385 | 0.1392103  | 356.9969 |
| cg23349790  | IC52A1    | 9  | 15311642  | 0.0415842  | 0.0730929  | 35.9589  | 0.0430559  | 34.46229 | 0.2631406  | 356.9969 |
| cg23517605  | TUBB2B    | 6  | 3173364   | 0.1467496  | 0.1833663  | 23.66128 | 0.183889   | 17.1079  | 0.2500322  | 356.9969 |
| cg23540745  | HIST1H4G  | 6  | 26355112  | 0.8056611  | 0.8426143  | 21.5972  | 0.8466293  | 27.0438  | 0.8482467  | 36.41195 |
| cg23606079  | CRISPLD2  | 16 | 83411372  | 0.0536623  | 0.5507284  | 13.9797  | 0.5628671  | 23.34311 | 0.5448018  | 13.9404  |
| cg23694248  | PTFRR     | 12 | 69600582  | 0.08282806 | 0.1102028  | 14.3691  | 0.1171827  | 22.9737  | 0.1619898  | 134.2318 |
| cg23695504  | FLJ45717  | 1  | 245341967 | 0.0664441  | 0.1955499  | 345.9589 | 0.1498442  | 343.9177 | 0.2891064  | 356.9969 |
| cg23710218  | M5C       | 9  | 7291960   | 0.1471636  | 0.1717036  | 31.1328  | 0.1447176  | 17.25437 | 0.2111973  | 101.2643 |
| cg23748737  | SCARF2    | 22 | 19121313  | 0.04255878 | 0.07168049 | 25.00612 | 0.07228766 | 25.44662 | 0.109767   | 137.0983 |
| cg23771603  | MYO3A     | 10 | 26263316  | 0.03946321 | 0.0946302  | 91.74947 | 0.08983277 | 76.96599 | 0.1638484  | 356.9969 |
| cg23833452  | HAB32     | 6  | 146906445 | 0.0824808  | 0.1496182  | 105.4871 | 0.1399412  | 19.98914 | 0.2310399  | 356.9969 |
| cg23850212  | ZFP28     | 19 | 61741669  | 0.02913207 | 0.05106704 | 16.25743 | 0.05076467 | 15.42353 | 0.08323005 | 108.4502 |
| cg23859899  | AGP5      | 12 | 48942088  | 0.1790602  | 0.2376708  | 38.30111 | 0.2320835  | 29.99142 | 0.303046   | 356.9969 |
| cg23950724  | SYT4      | 12 | 33429246  | 0.033045   | 0.0737226  | 31.19395 | 0.03137209 | 18.35001 | 0.4643311  | 356.9969 |
| cg23967169  | FAM19A3   | 3  | 69064193  | 0.04301019 | 0.07401209 | 28.47422 | 0.07750805 | 34.58676 | 0.09342165 | 83.36467 |
| cg23984434  | GUCY1A2   | 11 | 10633866  | 0.03929599 | 0.0792671  | 49.9235  | 0.06919469 | 29.02004 | 0.1314157  | 356.9969 |
| cg24056567  | PSD3      | 8  | 18918189  | 0.1547709  | 0.2127483  | 38.93169 | 0.1955602  | 16.97939 | 0.230216   | 86.21098 |
| cg24076884  | PCDHAC2   | 5  | 140327105 | 0.1508885  | 0.200966   | 32.69004 | 0.1899545  | 18.63852 | 0.2738218  | 356.9969 |
| cg24101359  | GNMT      | 6  | 43036473  | 0.04439934 | 0.07837129 | 33.9719  | 0.07632466 | 29.05766 | 0.1385122  | 356.9969 |
| cg24110578  | CDH22     | 20 | 44313670  | 0.1724539  | 0.2359311  | 46.3063  | 0.2123634  | 17.41752 | 0.2569575  | 94.4077  |
| cg24120841  | THR8      | 3  | 24512181  | 0.02069264 | 0.05316691 | 41.49623 | 0.05043947 | 33.86026 | 0.1176509  | 356.9969 |
| cg24127874  | HES6      | 2  | 238814598 | 0.1458754  | 0.2794232  | 34.9589  | 0.219719   | 73.95322 | 0.3061356  | 356.9969 |
| cg24133115  | PDE10A    | 6  | 165995510 | 0.06949112 | 0.1177437  | 53.57451 | 0.1181233  | 43.47062 | 0.1917116  | 356.9969 |
| cg24169822  | H0XA4     | 7  | 27137519  | 0.4422526  | 0.5674872  | 125.3522 | 0.5140418  | 54.3874  | 0.5572102  | 113.3429 |
| cg24176563  | EYA4      | 6  | 133604469 | 0.04623841 | 0.08727411 | 48.7057  | 0.07710634 | 26.48927 | 0.1270488  | 356.9969 |
| cg24198634  | POU4F2    | 4  | 147773976 | 0.0664429  | 0.1037395  | 31.80733 | 0.1024444  | 28.78658 | 0.1639355  | 356.9969 |
| cg24215443  | PTGFR3    | 13 | 13289232  | 0.03458493 | 0.0530927  | 36.81711 | 0.02948905 | 36.92153 | 0.1168904  | 356.9969 |
| cg242396745 | H0CN4     | 15 | 71447667  | 0.08698802 | 0.1581509  | 98.3911  | 0.1488456  | 74.93433 | 0.2251868  | 356.9969 |
| cg24245953  | CACNG1    | 17 | 62471071  | 0.8706093  | 0.8950135  | 13.94451 | 0.8955734  | 14.34851 | 0.892449   | 14.10844 |
| cg24641352  | ZFP41     | 8  | 144399453 | 0.2846392  | 0.3540409  | 40.16066 | 0.3304498  | 15.52643 | 0.3711072  | 72.18038 |
| cg24649521  | PENK      | 8  | 57921482  | 0.03829215 | 0.06054322 | 14.90047 | 0.06123162 | 15       |            |          |

|            |           |    |           |            |            |          |            |          |            |          |
|------------|-----------|----|-----------|------------|------------|----------|------------|----------|------------|----------|
| cg26207503 | MYF5      | 12 | 79634880  | 0.2466427  | 0.3072106  | 32.99706 | 0.3091205  | 34.34102 | 0.3730525  | 356.9969 |
| cg26238727 | UGT1A10   | 2  | 234209849 | 0.8450799  | 0.8748308  | 17.56435 | 0.8753819  | 18.01044 | 0.8706254  | 15.87949 |
| cg26252167 | GPR6      | 6  | 110407266 | 0.07551654 | 0.1209686  | 45.11324 | 0.1074825  | 21.09825 | 0.2242041  | 356.9969 |
| cg26320696 | PARVA     | 11 | 12355685  | 0.07570803 | 0.1222014  | 47.08142 | 0.1179337  | 37.65408 | 0.1714693  | 356.9969 |
| cg26323655 | FSBP      | 8  | 98517861  | 0.7441741  | 0.7792487  | 13.05343 | 0.7887009  | 22.6617  | 0.7949365  | 37.87258 |
| cg26372517 | TFAP2E    | 1  | 35811746  | 0.2795726  | 0.3831897  | 94.38761 | 0.3349526  | 24.10397 | 0.4301105  | 356.9969 |
| cg26453588 | BIK       | 22 | 41835965  | 0.4192379  | 0.506779   | 56.86924 | 0.4721362  | 17.80433 | 0.5010629  | 56.07082 |
| cg20504021 | IRX2      | 5  | 2305882   | 0.1217711  | 0.152092   | 13.15706 | 0.1608843  | 22.43451 | 0.1918628  | 85.13159 |
| cg26599306 | GSCL      | 22 | 17517371  | 0.02860504 | 0.04972031 | 13.41397 | 0.0534093  | 18.92521 | 0.1035891  | 356.9969 |
| cg26609631 | GSH1      | 13 | 27264814  | 0.06153295 | 0.1285883  | 107.2046 | 0.125272   | 96.55791 | 0.2255699  | 356.9969 |
| cg26619317 | CNN3      | 1  | 95164977  | 0.06180143 | 0.113571   | 65.628   | 0.1115232  | 60.071   | 0.1830835  | 356.9969 |
| cg26620157 | PAX9      | 14 | 36200048  | 0.07478639 | 0.1028045  | 16.28993 | 0.1083873  | 23.60226 | 0.1304999  | 75.94226 |
| cg26644504 | KCNE1L    | X  | 108756300 | 0.5882326  | 0.6528222  | 32.97848 | 0.6389316  | 18.19889 | 0.6315963  | 16.73915 |
| cg26687173 | LOC126248 | 19 | 38314931  | 0.8315594  | 0.8701516  | 29.44755 | 0.8747483  | 37.65872 | 0.8999671  | 126.8465 |
| cg26711820 | MYF6      | 12 | 79625820  | 0.1515648  | 0.2022582  | 33.43023 | 0.2040854  | 35.03302 | 0.2360162  | 103.7055 |
| cg26796190 | PYY       | 17 | 39438721  | 0.0296458  | 0.05264317 | 17.90134 | 0.04886918 | 13.21132 | 0.08525409 | 113.1692 |
| cg26822175 | CRYBA4    | 22 | 25348010  | 0.7878091  | 0.8413517  | 46.84223 | 0.8598429  | 93.86996 | 0.8538103  | 85.8487  |
| cg26845300 | SNX9      | 6  | 158163821 | 0.05885643 | 0.1278256  | 115.6954 | 0.1055788  | 54.36108 | 0.1724292  | 356.9969 |
| cg26896762 | ISL1      | 5  | 50715118  | 0.06846588 | 0.09950198 | 21.69634 | 0.09614222 | 16.60315 | 0.1280201  | 89.92125 |
| cg26929536 | SCG3      | 15 | 49760752  | 0.195499   | 0.2339101  | 14.567   | 0.2404622  | 20.28107 | 0.287406   | 102.4867 |
| cg26985289 | CLSTN1    | 1  | 9807209   | 0.04294315 | 0.0708963  | 22.93982 | 0.06594145 | 14.66539 | 0.1010152  | 107.0004 |
| cg27009703 | HXA9      | 7  | 27171419  | 0.04640554 | 0.09883118 | 77.82594 | 0.1036691  | 91.00295 | 0.1468317  | 356.9969 |
| cg27096144 | MSX2      | 5  | 174084385 | 0.09552565 | 0.163222   | 84.35762 | 0.1496693  | 53.70201 | 0.2288038  | 356.9969 |
| cg27120999 | HSPA2     | 14 | 64077803  | 0.3207451  | 0.4552866  | 345.9589 | 0.4053047  | 56.4542  | 0.4738687  | 356.9969 |
| cg27169020 | BNC1      | 15 | 81745233  | 0.2505465  | 0.3061539  | 26.98192 | 0.3007584  | 21.06313 | 0.340213   | 83.42342 |
| cg27223047 | FBN2      | 5  | 127902724 | 0.1322661  | 0.2077543  | 83.27486 | 0.1936856  | 54.37157 | 0.2583926  | 356.9969 |
| cg27320127 | KCNK12    | 2  | 47651900  | 0.057845   | 0.125803   | 113.313  | 0.1289808  | 122.13   | 0.1694694  | 356.9969 |
| cg27389185 | ZNF540    | 19 | 42733963  | 0.215742   | 0.2711099  | 30.1327  | 0.2669549  | 24.74426 | 0.3214588  | 125.4305 |
| cg27403635 | KCNN2     | 5  | 113726190 | 0.04807666 | 0.08370673 | 35.93866 | 0.07860775 | 25.31854 | 0.1265155  | 356.9969 |
| cg27409364 | KCNC1     | 11 | 11714319  | 0.3467687  | 0.4155696  | 35.2663  | 0.4000752  | 19.34814 | 0.5327069  | 356.9969 |
| cg27425675 | DEXI      | 16 | 10943234  | 0.3128334  | 0.3648265  | 19.83812 | 0.3688767  | 22.93908 | 0.4269695  | 119.3908 |
| cg27476329 | GOLGA2L1  | 12 | 99091086  | 0.7543266  | 0.7898156  | 14.13505 | 0.7909796  | 14.91746 | 0.7885153  | 16.84768 |
| cg27491887 | KCNQ1     | 11 | 2511159   | 0.03401833 | 0.06231215 | 26.23255 | 0.06036723 | 22.05113 | 0.06433444 | 36.21555 |
| cg27501458 | SULT4A1   | 22 | 42590023  | 0.0621512  | 0.09230316 | 21.74767 | 0.08725531 | 14.22715 | 0.1250544  | 104.2006 |
| cg27553585 | KCNG3     | 2  | 42573830  | 0.2649389  | 0.342862   | 53.96785 | 0.3318831  | 37.84329 | 0.3869828  | 356.9969 |
| cg27603796 | CTTNBP2   | 7  | 117300039 | 0.07887629 | 0.1171266  | 30.69244 | 0.1094006  | 18.53285 | 0.1482902  | 109.378  |
| cg27634151 | GPR83     | 11 | 93774294  | 0.06425825 | 0.1104799  | 51.63652 | 0.0996429  | 29.64739 | 0.1465686  | 356.9969 |

**Table S2. List of 330 CpG loci concurrently and significantly hypomethylated in centenarians, centenarians'offspring and offspring of non long-lived parents vs young controls. Columns indicate: Illumina Probe ID (ILMNID), NCBI gene symbol of associated gene (SYMBOL), chromosome localisation (CHR) and map informations (MAPINFO). For each probe we reported AVG beta in each group, and DiffScore, that indicates its level of significance vs young controls.**

| ILMNID                | SYMBOL     | CHR | MAPINFO   | YOUNG CONTROLS.AV G_Beta | CENTENARIANS' OFFSPRING.AVG_Beta | CENTENARIANS' OFFSPRING.DiffScore | OFFSPRING OF NON LONG-LIVED PARENTS.AVG_Beta | OFFSPRING OF NON LONG-LIVED PARENTS.DiffScore | CENTENARIANS.AV G_Beta | CENTENARIANS.Diff Score |
|-----------------------|------------|-----|-----------|--------------------------|----------------------------------|-----------------------------------|----------------------------------------------|-----------------------------------------------|------------------------|-------------------------|
| cg00136405            | IL21       | 4   | 123761648 | 0.4728598                | 0.4240257                        | -15.01396                         | 0.4183451                                    | -19.0383                                      | 0.3890795              | -59.56889               |
| cg00141845P11-311PB.1 | AGA        | X   | 74410077  | 0.3089329                | 0.259428                         | -20.28484                         | 0.2657028                                    | -14.27439                                     | 0.2446625              | -44.11953               |
| cg00174500            | CMTM5      | 14  | 22816319  | 0.8565797                | 0.7906154                        | -71.49622                         | 0.7900305                                    | -72.44791                                     | 0.7467912              | -217.2934               |
| cg00186954            | ST5        | 11  | 8890556   | 0.7541256                | 0.6880664                        | -46.39658                         | 0.6993327                                    | -30.30163                                     | 0.6803185              | -66.0472                |
| cg00209951            | DENNM2C    | 1   | 115014357 | 0.0628654                | 0.05789062                       | -14.99949                         | 0.05879908                                   | -13.10313                                     | 0.06017039             | -15.30125               |
| cg02229397            | TJP1       | 6   | 43553200  | 0.4115071                | 0.3619993                        | -16.33092                         | 0.3603413                                    | -17.16198                                     | 0.334918               | -52.21939               |
| cg00308665            | HTR2A      | 13  | 46387655  | 0.5142115                | 0.4676489                        | -13.41184                         | 0.417334                                     | -70.61234                                     | 0.3450799              | -246.952                |
| cg00343092            | DZRP       | 22  | 41077910  | 0.04629302               | 0.02493012                       | -16.26532                         | 0.0237245                                    | -10.3027                                      | 0.026430               | -17.0730                |
| cg00353953            | ZNF384     | 12  | 6669802   | 0.3112201                | 0.2689171                        | -13.80173                         | 0.2462953                                    | -37.33108                                     | 0.2428157              | -50.13409               |
| cg00392257            | ISG20L2    | 1   | 154963371 | 0.7540206                | 0.6855279                        | -50.13595                         | 0.6938614                                    | -37.05069                                     | 0.6340421              | -166.7619               |
| cg00397945            | APOC1      | 19  | 50139366  | 0.4945059                | 0.4454289                        | -15.14232                         | 0.4312081                                    | -26.70804                                     | 0.4368835              | -27.21166               |
| cg00398048            | AGA        | 4   | 178631336 | 0.2772985                | 0.2141752                        | -40.21252                         | 0.227798                                     | -21.97688                                     | 0.1770803              | -123.4769               |
| cg00431114            | C20orf1121 | 20  | 42537441  | 0.2781705                | 0.2338427                        | -17.39514                         | 0.2339977                                    | -16.73714                                     | 0.2054061              | -83.43237               |
| cg00451635            | EMP2       | 16  | 10582310  | 0.6673892                | 0.5825795                        | -61.14648                         | 0.5689                                       | -83.12023                                     | 0.509988               | -236.7415               |
| cg00563932            | PTGDS      | 9   | 138990870 | 0.5684094                | 0.4833137                        | -54.19538                         | 0.468496                                     | -76.21863                                     | 0.4307101              | -165.3017               |
| cg00582628            | RGS20      | 8   | 54927068  | 0.4004345                | 0.3428123                        | -23.7711                          | 0.3349794                                    | -31.17859                                     | 0.286813               | -123.0717               |
| cg00609280            | WFDC10B    | 20  | 43786147  | 0.7427672                | 0.6853172                        | -32.99708                         | 0.7015578                                    | -15.45263                                     | 0.6521314              | -94.40548               |
| cg00618625            | NRS1A      | 9   | 12630929  | 0.091444                 | 0.0773437                        | -14.5819                          | 0.073090                                     | -19.32362                                     | 0.0605977              | -50.28995               |
| cg00705700            | LIPK2      | 11  | 118332292 | 0.7417098                | 0.6823411                        | -35.28769                         | 0.6873456                                    | -28.36979                                     | 0.6450125              | -106.4634               |
| cg00895324            | PCP4       | 21  | 40160387  | 0.6874025                | 0.6445047                        | -14.2848                          | 0.627979                                     | -28.97118                                     | 0.5998274              | -76.51313               |
| cg00995152            | DAB2IP     | 9   | 123536136 | 0.7987885                | 0.7569591                        | -21.39237                         | 0.7469597                                    | -33.10307                                     | 0.7310379              | -66.9968                |
| cg01040850            | MR1        | 1   | 179269292 | 0.7161569                | 0.6445815                        | -48.3063                          | 0.6599364                                    | -27.90646                                     | 0.6307232              | -78.0948                |
| cg01432087            | FLJ21740   | 11  | 66939838  | 0.7842926                | 0.74704                          | -16.27193                         | 0.7366727                                    | -26.60543                                     | 0.729096               | -60.48463               |
| cg01459453            | GELP       | 1   | 16785536  | 0.7347738                | 0.6580462                        | -57.70612                         | 0.619498                                     | -134.2655                                     | 0.5805461              | -257.5824               |
| cg01511567            | SSRP1      | 11  | 68860207  | 0.4482679                | 0.3188014                        | -13.07971                         | 0.1111792                                    | -21.08825                                     | 0.101572               | -45.57811               |
| cg01612158            | FCRL4      | 1   | 155834344 | 0.4994417                | 0.4471704                        | -17.54136                         | 0.4506918                                    | -14.50699                                     | 0.4396414              | -29.33844               |
| cg01618660            | TRIM14     | 9   | 99922197  | 0.666982                 | 0.6119994                        | -23.74788                         | 0.6057965                                    | -29.33295                                     | 0.581263               | -58.13617               |
| cg01671881            | C20orf71   | 20  | 31268662  | 0.826497                 | 0.7900511                        | -17.50504                         | 0.7860038                                    | -21.67056                                     | 0.7386813              | -30.58845               |
| cg01745657            | PLCXD2     | 3   | 112875859 | 0.1641217                | 0.1055817                        | -59.34784                         | 0.1125031                                    | -42.83401                                     | 0.1072036              | -63.06136               |
| cg01753375            | DCTN1      | 2   | 74461108  | 0.6053709                | 0.5492793                        | -22.12191                         | 0.5298913                                    | -41.87669                                     | 0.46217                | -133.6042               |
| cg01805598            | PSMD6      | 6   | 8930076   | 0.8201237                | 0.5595645                        | -26.86985                         | 0.584252                                     | -31.60928                                     | 0.511029               | -103.994                |
| cg01820374            | LAC3       | 12  | 6752344   | 0.427747                 | 0.2924534                        | -62.4967                          | 0.2944688                                    | -155.3162                                     | 0.1952613              | -354.0796               |
| cg01916401            | RUNX2      | 6   | 45401079  | 0.4028823                | 0.3479501                        | -21.16888                         | 0.3353712                                    | -33.38776                                     | 0.3060523              | -81.32763               |
| cg01970325            | NELF       | 9   | 138474062 | 0.6345366                | 0.5705072                        | -31.21771                         | 0.5664235                                    | -34.83274                                     | 0.5216393              | -119.0325               |
| cg02163528            | OBFC2B     | 12  | 54904915  | 0.1093846                | 0.0798253                        | -18.5991                          | 0.0750533                                    | -23.51752                                     | 0.0672909              | -48.1334                |
| cg02228185            | ASPA       | 17  | 3326317   | 0.6500667                | 0.4919592                        | -22.7688                          | 0.4995214                                    | -197.8839                                     | 0.3524646              | -354.0796               |
| cg02278695            | CTNNA1     | 5   | 138116341 | 0.419444                 | 0.3366563                        | -24.4659                          | 0.397251                                     | -41.5475                                      | 0.320494               | -69.5294                |
| cg02334775            | ISG20      | 15  | 86983680  | 0.629435                 | 0.5603613                        | -60.3832                          | 0.576674                                     | -62.06961                                     | 0.4640533              | -354.0796               |
| cg02337447            | SCO1       | 17  | 10542577  | 0.3289934                | 0.2853521                        | -14.19026                         | 0.2664082                                    | -32.63079                                     | 0.2675916              | -62.01289               |
| cg02401978            | FLJ131413  | 7   | 148826398 | 0.5059580                | 0.4419265                        | -27.97393                         | 0.4389572                                    | -30.26247                                     | 0.452671               | -22.99132               |
| cg02523617            | HIP2       | 4   | 39375775  | 0.2281299                | 0.1871115                        | -17.55017                         | 0.1844754                                    | -19.95094                                     | 0.192823               | -16.00913               |
| cg02657721            | SEMA3B     | 3   | 90280395  | 0.3302877                | 0.2317807                        | -95.32116                         | 0.2350333                                    | -67.67953                                     | 0.1705103              | -316.1873               |
| cg02828104            | Kat5       | 20  | 47894767  | 0.4699494                | 0.3689563                        | -49.94767                         | 0.3438529                                    | -63.89244                                     | 0.3423153              | -160.2917               |
| cg02833725            | ISG20L2    | 12  | 154963392 | 0.7557245                | 0.6924195                        | -42.63474                         | 0.7019196                                    | -29.31538                                     | 0.6439926              | -146.2264               |
| cg02838877            | MBNL2      | 13  | 96671878  | 0.4370856                | 0.36884                          | -33.75081                         | 0.3423034                                    | -70.88327                                     | 0.3250716              | -113.3494               |
| cg03224418            | SAMD10     | 20  | 62082302  | 0.3967906                | 0.3256412                        | -39.17096                         | 0.3181791                                    | -48.14034                                     | 0.2479669              | -226.4845               |
| cg03343942            | SLC39A5    | 12  | 54911376  | 0.8998482                | 0.8654173                        | -13.37648                         | 0.8649001                                    | -13.66342                                     | 0.8390663              | -69.16692               |
| cg03375002            | LAT2       | 7   | 73281812  | 0.3988772                | 0.3452432                        | -20.11715                         | 0.3507443                                    | -15.19637                                     | 0.3042447              | -83.02184               |
| cg03440846            | ACSS2      | 20  | 32828210  | 0.3134066                | 0.1537311                        | -61.93749                         | 0.1741824                                    | -70.1386                                      | 0.1320289              | -160.2917               |
| cg03465320            | TAP1       | 6   | 32931056  | 0.3501791                | 0.3008526                        | -18.06906                         | 0.2849782                                    | -34.0296                                      | 0.2311209              | -151.335                |
| cg03643709            | VPS18      | 15  | 38974076  | 0.1547507                | 0.1192298                        | -18.9641                          | 0.1113545                                    | -30.09323                                     | 0.1164905              | -27.96815               |
| cg03764585            | FMOD       | 1   | 201586846 | 0.3242713                | 0.2571637                        | -40.01235                         | 0.2371153                                    | -72.81727                                     | 0.2170526              | -128.348                |
| cg03908676            | XIKD1      | 11  | 10546858  | 0.5336052                | 0.479244                         | -19.30504                         | 0.4717462                                    | -25.31854                                     | 0.428007               | -94.80461               |
| cg03929796            | ALAS1      | 3   | 92260860  | 0.1363276                | 0.1072523                        | -13.36505                         | 0.1003581                                    | -21.92669                                     | 0.07740319             | -82.35855               |
| cg03972838            | FLJ2012    | 2   | 39282626  | 0.7557771                | 0.7178954                        | -17.89528                         | 0.68692978                                   | -36.85948                                     | 0.7045996              | -154.2246               |
| cg03991512            | LHDH       | 16  | 37370957  | 0.5442821                | 0.4508488                        | -65.89568                         | 0.4727711                                    | -35.45419                                     | 0.467207               | -97.01416               |
| cg03996822            | RASSF6     | 4   | 74705422  | 0.4451779                | 0.3501299                        | -70.86332                         | 0.311999                                     | -151.3232                                     | 0.3074597              | -175.7562               |
| cg04019407            | GIP        | 17  | 44401303  | 0.7987641                | 0.7645673                        | -13.71771                         | 0.7584389                                    | -19.28637                                     | 0.7409508              | -49.51334               |
| cg04038898            | POMGNT1    | 1   | 46437185  | 0.4756859                | 0.3799561                        | -70.12952                         | 0.3663231                                    | -33.60806                                     | 0.3240013              | -210.587                |
| cg04037228            | LUMD1      | 3   | 45611390  | 0.5717196                | 0.4891979                        | -50.87369                         | 0.4967623                                    | -39.92717                                     | 0.4203252              | -202.4903               |
| cg04123409            | SDS        | 10  | 11232600  | 0.2989885                | 0.2279704                        | -56.14487                         | 0.2522935                                    | -62.39569                                     | 0.1932402              | -154.2246               |
| cg04151683            | LRRN4C     | 12  | 8930076   | 0.5982925                | 0.5329425                        | -33.59498                         | 0.5271332                                    | -43.87749                                     | 0.5212968              | -52.32867               |
| cg04155793            | CDK10      | 16  | 88280348  | 0.6681854                | 0.571796                         | -70.19353                         | 0.6156206                                    | -16.31211                                     | 0.5361429              | -151.1565               |
| cg04341806            | LCP1       | 13  | 45655396  | 0.7068565                | 0.651307                         | -27.03194                         | 0.6382437                                    | -41.71909                                     | 0.6014828              | -114.6235               |
| cg04424621            | HIST1H2BJ  | 6   | 27209920  | 0.1148823                | 0.08632717                       | -15.25409                         | 0.07494801                                   | -33.80716                                     | 0.07151626             | -49.12426               |
| cg04431054            | LOC133619  | 5   | 126680923 | 0.1360268                | 0.1467068                        | -32.42454                         | 0.1506758                                    | -25.71902                                     | 0.1630996              | -15.84892               |
| cg04474832            | ABHD11A    | 3   | 51983527  | 0.2674673                | 0.2218516                        | -19.16781                         | 0.2183254                                    | -22.39559                                     | 0.1861686              | -63.5486                |
| cg04559909            | CYCL1      | 4   | 83371907  | 0.6178844                | 0.5181922                        | -48.93171                         | 0.5174435                                    | -46.4329                                      | 0.5397118              | -121.0379               |
| cg04561804            | TLOC1      | 3   | 171166670 | 0.5174598                | 0.4639282                        | -18.55813                         | 0.4289876                                    | -57.27983                                     | 0.4365817              | -54.65139               |
| cg04662594            | EPB49      | 8   | 21972961  | 0.3392861                | 0.2761059                        | -33.37927                         | 0.258663                                     | -57.97816                                     | 0.2124487              | -108.1222               |
| cg04721098            | CACNG3     | 16  | 24173204  | 0.7802885                | 0.744357                         | -13.61387                         | 0.7376753                                    | -19.46045                                     | 0.7451863              | -16.81191               |
| cg04747619            | DEFA5      | 8   | 6902248   | 0.634699                 | 0.5724158                        | -29.34477                         | 0.5684101                                    | -32.86113                                     | 0.5068256              | -148.3359               |
| cg05026186            | ABLIM3     | 5   | 14891069  | 0.2961071                | 0.2062335                        | -24.84634                         | 0.2117069                                    | -18.40014                                     | 0.2186329              | -16.33735               |
| cg05154798            | HNR1P4     | 5   | 83371907  | 0.6178844                | 0.5181922                        | -48.93171                         | 0.5174435                                    | -46.4329                                      | 0.5397118              | -121.0379               |
| cg05190718            | CASQ2      | 1   | 116112235 | 0.8272871                | 0.7921115                        | -17.39847                         | 0.781781                                     | -18.06958                                     | 0.7566801              | -83.36578               |
| cg05228406            | CLCN6      | 1   | 11787939  | 0.423724                 | 0.3657593                        | -23.40219                         | 0.3495235                                    | -40.41292                                     | 0.3394646              | -62.95072               |
| cg05379350            | GIT1       | 17  | 24941283  | 0.1846594                | 0.1149999                        | -78.60734                         | 0.1120783                                    | -86.00595                                     | 0.09999474             | -135.4341               |
| cg0524065             | PHKG1      | 7   | 56128022  | 0.8015087                | 0.7418274                        | -46.53547                         | 0.7359981                                    | -65.33271                                     | 0.6639099              | -254.0501               |
| cg05825232            | ELN        | 7   | 73080467  | 0.2940024                | 0.2109591                        | -71.62494                         | 0.1816081                                    | -145.3222                                     | 0.2081355              | -86.41518               |
| cg05925416            | CYP22B1B   | 10  | 55117454  | 0.5527972                | 0.4951973                        | -41.85277                         | 0.4951973                                    | -41.85277                                     | 0.4784578              | -47.84578               |
| cg05989524            | ILMNA      | 1   | 154349900 | 0.4491323                | 0.3920467                        | -22.02072                         | 0.3693483                                    | -46.51368                                     | 0.3348672              | -116.8012               |
| cg05949660            | MICAL1     | 6   | 109884335 | 0.7498299                | 0.7120994                        | -13.38154                         | 0.6939127                                    | -31.09214                                     | 0.6550418              | -105.0448               |
| cg06069187            | SARM1      | 17  | 23722410  | 0.09023373               | 0.06004964                       | -22.26206                         | 0.06226399                                   | -18.08973                                     | 0.05853045             | -30.58904               |
| cg06131859            | KYNU       | 2   | 143351601 | 0.3361864                | 0.2885552                        | -17.18392                         | 0.2666734                                    | -40.91074                                     | 0.2322761              | -116.1679               |
| cg06139319            | OSBPL5     | 11  | 31435847  | 0.5058795                | 0.4528145                        | -18.25975                         | 0.445961                                     | -23.58294                                     | 0.4120133              | -74.88845               |
| cg06143901            | TCF15      | 20  |           |                          |                                  |                                   |                                              |                                               |                        |                         |

|            |           |    |           |            |            |           |            |             |            |            |
|------------|-----------|----|-----------|------------|------------|-----------|------------|-------------|------------|------------|
| cg09971811 | CST7      | 20 | 24878099  | 0.2448943  | 0.2054215  | -14.80453 | 0.1833199  | -41.92645   | 0.1340764  | -185.2314  |
| cg09980522 | GR1A4     | 11 | 104987012 | 0.2444959  | 0.198819   | -11.13637 | 0.2051962  | -14.30069   | 0.1954747  | -30.50603  |
| cg09983855 | TRIM21    | 11 | 4371762   | 0.2741386  | 0.2080409  | -44.39968 | 0.2054969  | -48.49593   | 0.1885075  | -91.84476  |
| cg10037088 | WASPO1    | 2  | 7340518   | 0.1867025  | 0.2744051  | -72.29035 | 0.1744102  | -74.55373   | 0.1544732  | -89.08472  |
| cg10052840 | SEMA6B    | 19 | 4509119   | 0.1816705  | 0.2744652  | -72.29829 | 0.2454655  | -48.30365   | 0.2764875  | -129.94    |
| cg10084933 | SLC9A3R2  | 16 | 2017648   | 0.4707176  | 0.4107655  | -24.3306  | 0.4051559  | -29.18659   | 0.3787236  | -72.54522  |
| cg10106284 | FAM49A    | 2  | 16711469  | 0.5273116  | 0.4400361  | -56.37743 | 0.4505277  | -35.97298   | 0.3911656  | -161.2267  |
| cg10203483 | LOC284948 | 2  | 8549970   | 0.6505823  | 0.5907363  | -27.9478  | 0.6034036  | -16.05316   | 0.5506179  | -93.33501  |
| cg10423880 | CST5      | 20 | 23808761  | 0.6364214  | 0.5915031  | -14.02885 | 0.5804163  | -22.63532   | 0.538395   | -94.73     |
| cg10528999 | BKBR1     | 14 | 95732059  | 0.6088112  | 0.5580061  | -14.96377 | 0.5601709  | -44.30462   | 0.5119495  | -77.89922  |
| cg10622172 | CFRFB5    | 7  | 28305282  | 0.6502028  | 0.5019888  | -16.0955  | 0.4668009  | -52.98213   | 0.443323   | -100.8561  |
| cg10682846 | GNMT      | 6  | 43035964  | 0.6087763  | 0.5463231  | -28.33564 | 0.5531155  | -21.37062   | 0.569647   | -11.00218  |
| cg10917602 | HSD3B7    | 16 | 30904131  | 0.5934159  | 0.5188875  | -41.2368  | 0.5121123  | -48.9178    | 0.4344174  | -226.2216  |
| cg10986043 | TCAP      | 17 | 35074021  | 0.6615129  | 0.6128805  | -17.75828 | 0.6001614  | -29.17365   | 0.5885224  | -50.60661  |
| cg10994379 | CAPSL     | 5  | 35975177  | 0.600166   | 0.5519972  | -15.45633 | 0.5444406  | -21.1669    | 0.5581183  | -14.9674   |
| cg11147896 | NFAF5     | 16 | 68155597  | 0.1804149  | 0.4435965  | -17.13391 | 0.41419214 | -19.03999   | 0.1475522  | -17.7404   |
| cg11251498 | INDOL1    | 8  | 39911926  | 0.4741017  | 0.4162942  | -22.30374 | 0.421258   | -42.1258    | 0.3640792  | -105.3159  |
| cg12199964 | MAPKAP1   | 9  | 127509604 | 0.2275406  | 0.1561955  | -65.90917 | 0.1525594  | -73.84767   | 0.1342485  | -134.5226  |
| cg11314684 | AKT3      | 1  | 242072911 | 0.2914758  | 0.2322583  | -32.86468 | 0.2455585  | -17.55661   | 0.2242064  | -51.23547  |
| cg11393848 | C1QC      | 1  | 22841927  | 0.4914265  | 0.4268404  | -28.6514  | 0.4196817  | -35.49034   | 0.359517   | -77.60791  |
| cg11466837 | TRIM29    | 11 | 119514892 | 0.7842762  | 0.7418118  | -20.44864 | 0.7483956  | -13.7007    | 0.7093998  | -76.13888  |
| cg11521325 | FLJ32926  | 19 | 53503090  | 0.5445978  | 0.5970914  | -24.75805 | 0.5973857  | -23.89336   | 0.5203399  | -123.4817  |
| cg11726593 | IMP1A     | 8  | 82761356  | 0.2209847  | 0.1842075  | -13.94681 | 0.1825255  | -15.16495   | 0.1664337  | -42.40506  |
| cg1919694  | TBC1D10B  | 16 | 30288101  | 0.1342846  | 0.10492    | -13.90876 | 0.100774   | -18.79477   | 0.09667839 | -51.95156  |
| cg12261786 | C10orf116 | 10 | 88718710  | 0.7148511  | 0.638229   | -55.4795  | 0.6305337  | -67.06512   | 0.5799208  | -189.9313  |
| cg12334759 | C19orf19  | 19 | 426154    | 0.7926051  | 0.752422   | -18.92962 | 0.7448838  | -26.85255   | 0.7138738  | -86.54233  |
| cg12434587 | MGMT      | 10 | 131155199 | 0.05615582 | 0.02377647 | -39.66273 | 0.02874726 | -25.62413   | 0.02858192 | -32.34854  |
| cg12437481 | MRF128    | 16 | 380113    | 0.702499   | 0.5965321  | -179.947  | 0.5609281  | -191.7145   | 0.6182558  | -71.05267  |
| cg12554573 | PARP3     | 3  | 51951707  | 0.7154828  | 0.6383679  | -54.81308 | 0.6523737  | -35.74471   | 0.5385828  | -330.6467  |
| cg12650780 | SH3BGR1   | X  | 80344705  | 0.3796563  | 0.3313735  | -16.17483 | 0.3161152  | -30.17373   | 0.2829265  | -90.3225   |
| cg12819826 | PPAN      | 19 | 10077676  | 0.3947683  | 0.3380415  | -23.14773 | 0.3182067  | -45.39314   | 0.2661569  | -163.2981  |
| cg12941369 | PDCD6IP   | 3  | 33814393  | 0.3110498  | 0.2658783  | -16.17623 | 0.2531357  | -28.56619   | 0.2281584  | -76.01257  |
| cg12981137 | MGMT      | 10 | 131155585 | 0.06185778 | 0.01805769 | -76.40689 | 0.03410822 | -30.80175   | 0.0230097  | -64.84192  |
| cg13129045 | C10orf35  | 10 | 71052702  | 0.1519733  | 0.1051102  | -37.84594 | 0.1063714  | -34.42756   | 0.1033055  | -45.57599  |
| cg13180098 | RHO       | 3  | 130729513 | 0.8163340  | 0.7692453  | -13.94451 | 0.7822085  | -14.78107   | 0.7323268  | -108.8148  |
| cg13185177 | GP5       | 3  | 195601174 | 0.5442098  | 0.4825129  | -25.956   | 0.4712729  | -37.05271   | 0.4011229  | -179.0508  |
| cg13210534 | HSPB2     | 11 | 111289538 | 0.5988191  | 0.5446165  | -20.2762  | 0.5364614  | -27.13819   | 0.5150192  | -61.08231  |
| cg13302154 | MGP       | 12 | 14930699  | 0.3270447  | 0.2742234  | -22.50198 | 0.2293486  | -33.65224   | 0.2177365  | -132.8549  |
| cg13351161 | SCARA3    | 8  | 27548840  | 0.3487075  | 0.3011865  | -15.00596 | 0.2552639  | -26.75452   | 0.2586927  | -78.9156   |
| cg13406950 | GBP1      | 1  | 89303252  | 0.2165764  | 0.1732249  | -21.22025 | 0.1959222  | -39.51111   | 0.1442477  | -80.38663  |
| cg13726191 | FGFBP1    | 10 | 33871030  | 0.8110358  | 0.463676   | -13.94451 | 0.44191116 | -32.58696   | 0.4563077  | -23.34449  |
| cg13993218 | INS       | 11 | 2138442   | 0.7497115  | 0.6995642  | -25.13888 | 0.6920485  | -33.21061   | 0.6317107  | -159.3924  |
| cg1398293  | TRIM63    | 1  | 26267022  | 0.6789252  | 0.6256956  | -20.76249 | 0.6268947  | -19.23466   | 0.580866   | -89.78774  |
| cg14127336 | TCL1A     | 14 | 95250072  | 0.9225986  | 0.8874009  | -41.52043 | 0.8602383  | -121.5085   | 0.8583577  | -139.4182  |
| cg14175438 | FAM3C     | 7  | 120823965 | 0.1782493  | 0.1394988  | -20.05404 | 0.131112   | -31.37146   | 0.1108461  | -84.30112  |
| cg1417895  | C6orf105  | 6  | 11896868  | 0.2035514  | 0.1693501  | -14.90047 | 0.1599657  | -25.19131   | 0.1518926  | -44.61185  |
| cg14383674 | MARPL1    | 10 | 30871030  | 0.8110358  | 0.463676   | -13.94451 | 0.44191116 | -32.58696   | 0.4563077  | -23.34449  |
| cg1435882  | BTN3A2    | 6  | 2642772   | 0.6119122  | 0.5119361  | -38.94613 | 0.134977   | -15.22511   | 0.1333653  | -22.0588   |
| cg14377791 | LOC400696 | 19 | 44861752  | 0.3668278  | 0.3015321  | -33.88523 | 0.3111133  | -22.71385   | 0.2549005  | -126.9324  |
| cg14719352 | FUT1      | 19 | 53949943  | 0.8152085  | 0.7773013  | -18.97921 | 0.7771257  | -18.73707   | 0.7356169  | -97.75568  |
| cg14820573 | C16orf33  | 16 | 42121     | 0.9027035  | 0.8751717  | -18.91106 | 0.8751673  | -19.28609   | 0.8625944  | -50.02734  |
| cg15037004 | ZNF366    | 5  | 71839694  | 0.406426   | 0.3390606  | -34.04744 | 0.3316357  | -41.87669   | 0.2942723  | -118.5868  |
| cg15129294 | GLIS3     | 19 | 84942868  | 0.8982487  | 0.8492688  | -46.11918 | 0.8411918  | -51.52856   | 0.8269586  | -100.3958  |
| cg15195412 | CX3CL1    | 16 | 5964456   | 0.5220738  | 0.4699573  | -17.4356  | 0.4642057  | -21.73109   | 0.4011127  | -125.9858  |
| cg15226751 | LZIC      | 1  | 9924498   | 0.8725055  | 0.8396399  | -21.34279 | 0.8372506  | -24.21965   | 0.8484859  | -54.25347  |
| cg15287183 | PPP1R9A   | 7  | 94375669  | 0.1002601  | 0.06455272 | -30.37303 | 0.07060823 | -18.83208   | 0.0728652  | -20.18356  |
| cg15298323 | ACAT2     | 6  | 160102428 | 0.3485804  | 0.2871585  | -30.52308 | 0.2869172  | -29.99595   | 0.2834212  | -41.25911  |
| cg15364818 | CIDEB     | 14 | 23850391  | 0.3591790  | 0.2770841  | -58.44732 | 0.2790963  | -64.28399   | 0.2707369  | -77.63215  |
| cg15417244 | PDZRN4    | 12 | 47215265  | 0.6286988  | 0.578211   | -26.37461 | 0.57923894 | -18.4737461 | 0.5332541  | -100.32541 |
| cg15431916 | CNNM2     | 10 | 10486697  | 0.2571396  | 0.2184732  | -13.92738 | 0.2084635  | -22.76721   | 0.2047989  | -83.93553  |
| cg1558427  | LOC221091 | 11 | 62213590  | 0.4550492  | 0.3953295  | -24.28915 | 0.382057   | -37.65408   | 0.3315493  | -136.5602  |
| cg15776355 | C1R       | 12 | 7137031   | 0.3292638  | 0.2576123  | -45.99006 | 0.248342   | -60.12506   | 0.2085977  | -165.2231  |
| cg15798819 | ALDH3A1   | 17 | 19591782  | 0.4217175  | 0.3727183  | -15.43008 | 0.3663392  | -20.61849   | 0.3070615  | -121.3929  |
| cg15804973 | MAP3K5    | 6  | 137156206 | 0.3092636  | 0.1879301  | -16.77436 | 0.1781113  | -20.05262   | 0.1392021  | -354.0796  |
| cg15913671 | TNEM105   | 17 | 76919015  | 0.7982829  | 0.7342652  | -33.26833 | 0.7342652  | -33.26833   | 0.7071459  | -71.00225  |
| cg16035531 | FBX11     | 1  | 95589545  | 0.7908245  | 0.7538267  | -15.34796 | 0.7495112  | -19.2135    | 0.7378402  | -39.96427  |
| cg16127900 | GPRC6A    | 6  | 117257188 | 0.4242073  | 0.3646843  | -25.11488 | 0.3581618  | -31.14591   | 0.3174523  | -104.5138  |
| cg16175792 | HSD3B1    | 1  | 119851627 | 0.5872012  | 0.5199474  | -32.67156 | 0.5360424  | -17.14183   | 0.5086728  | -52.96764  |
| cg16363586 | BST2      | 19 | 17377329  | 0.1012149  | 0.0715621  | -19.07077 | 0.0655622  | -29.17411   | 0.04996379 | -80.40482  |
| cg16470760 | CD4       | 12 | 6768478   | 0.7169006  | 0.6690298  | -20.06781 | 0.672160   | -16.90989   | 0.6703782  | -32.62286  |
| cg16505550 | PPAP2B    | 1  | 59818296  | 0.7446677  | 0.6951129  | -23.92018 | 0.7061372  | -13.2889    | 0.6763963  | -54.82374  |
| cg16609782 | KCNJ11    | 11 | 2781940   | 0.633394   | 0.5738114  | -29.8716  | 0.5780722  | -24.82559   | 0.5275403  | -127.7543  |
| cg16620032 | GPR4      | 19 | 50788915  | 0.1461679  | 0.1162633  | -13.27905 | 0.1110301  | -19.21907   | 0.09018632 | -68.44662  |
| cg16744741 | PRKG2     | 4  | 82345049  | 0.4130004  | 0.3015554  | -10.8242  | 0.3068185  | -93.94085   | 0.2761017  | -181.9251  |
| cg16853860 | TAP1      | 6  | 32931094  | 0.5305844  | 0.4745823  | -24.72634 | 0.4641004  | -34.65625   | 0.398592   | -161.8755  |
| cg16899306 | H1A-DOB2  | 6  | 32840663  | 0.8137879  | 0.751075   | -54.78106 | 0.7207951  | -11.81742   | 0.7098831  | -158.5329  |
| cg16929104 | GDF15     | 19 | 16387968  | 0.3727304  | 0.3257593  | -15.48488 | 0.3212976  | -16.53295   | 0.3217032  | -22.44041  |
| cg1704109  | CY55B1D1  | 1  | 10981370  | 0.5671717  | 0.5010813  | -31.49679 | 0.5090166  | -22.23914   | 0.436949   | -148.849   |
| cg17199483 | ABCC1     | 16 | 15950268  | 0.08195233 | 0.05248223 | -22.35547 | 0.05439414 | -18.53285   | 0.04074909 | -58.37799  |
| cg17267907 | DEFA1     | 8  | 8625344   | 0.7333763  | 0.6671795  | -43.19177 | 0.6872249  | -19.2135    | 0.6768863  | -36.61     |
| cg17339202 | SYNC1     | 1  | 32933487  | 0.1312798  | 0.09958176 | -47.1676  | 0.0789833  | -56.94889   | 0.07016526 | -92.93568  |
| cg17378989 | ERCC1     | 1  | 50618591  | 0.1247918  | 0.0923033  | -19.23399 | 0.09523379 | -14.88144   | 0.09561832 | -19.00123  |
| cg17408986 | CHCHD3    | 3  | 127850265 | 0.9688609  | 0.9107689  | -25.59146 | 0.9129765  | -22.77338   | 0.2969343  | -48.99615  |
| cg17421623 | C3orf1    | 3  | 12057050  | 0.2554711  | 0.1804959  | -45.47247 | 0.1731723  | -40.38744   | 0.1385562  | -193.8794  |
| cg17471102 | FUT3      | 19 | 5802255   | 0.7067176  | 0.5702834  | -15.5132  | 0.5592297  | -209.1358   | 0.4779872  | -354.0796  |
| cg17720233 | TNFAIP6L2 | 1  | 149394934 | 0.7694218  | 0.7236131  | -22.48217 | 0.7206097  | -25.16337   | 0.7020809  | -58.53433  |
| cg17786776 | FKBP9     | 7  | 32862670  | 0.6312266  | 0.5720237  | -26.00779 | 0.5690912  | -37.106     | 0.5450161  | -67.16508  |
| cg1786959  | MT2A      | 16 | 551       |            |            |           |            |             |            |            |

|            |          |    |           |           |            |           |            |           |            |            |
|------------|----------|----|-----------|-----------|------------|-----------|------------|-----------|------------|------------|
| cg21663431 | SLC44A2  | 19 | 10597355  | 0.8710043 | 0.8369463  | -22.75285 | 0.8338655  | -26.67247 | 0.8362402  | -29.12044  |
| cg21680178 | GPATC3   | 1  | 27099447  | 0.105004  | 0.07157529 | -24.72383 | 0.06989522 | -27.13619 | 0.0813179  | -14.13406  |
| cg21985470 | PKLR     | 1  | 15353847  | 0.87204   | 0.8399609  | -20.16894 | 0.8405003  | -19.02258 | 0.8082746  | -90.78716  |
| cg22044451 | TUBA3    | 12 | 47893763  | 0.6115999 | 0.587263   | -13.05343 | 0.5490371  | -27.93532 | 0.5075012  | -95.80119  |
| cg22197830 | C5orf14  | 5  | 134237683 | 0.7913385 | 0.7274389  | -50.90396 | 0.7501988  | -19.34814 | 0.6967705  | -121.095   |
| cg22226839 | ATP2B4   | 1  | 201862674 | 0.324451  | 0.2457086  | -57.91495 | 0.2470613  | -54.63404 | 0.242913   | -70.71608  |
| cg22253945 | GPR45    | 2  | 105224921 | 0.8819357 | 0.8559448  | -13.9797  | 0.8524827  | -18.01044 | 0.8400479  | -45.17864  |
| cg22580512 | NCOR2    | 12 | 123568427 | 0.8349384 | 0.7366107  | -148.0313 | 0.7321865  | -159.7668 | 0.6282698  | -354.0796  |
| cg22730004 | SPTA1    | 1  | 156923342 | 0.1945941 | 0.1464576  | -31.32529 | 0.1398761  | -41.31995 | 0.1131671  | -118.2706  |
| cg22749425 | GGT1     | 22 | 23309664  | 0.7322585 | 0.6534526  | -61.97991 | 0.6623821  | -46.40129 | 0.5884476  | -223.5157  |
| cg22830895 | CRYGN    | 7  | 150768409 | 0.4208398 | 0.3534539  | -33.46381 | 0.3323681  | -61.48236 | 0.335905   | -64.37744  |
| cg22892904 | CBX2     | 17 | 75365684  | 0.2876134 | 0.2460204  | -14.28341 | 0.2439826  | -15.68627 | 0.2396165  | -25.09639  |
| cg22905881 | CD4      | 12 | 6769236   | 0.3750396 | 0.3280909  | -15.24077 | 0.3164738  | -25.1009  | 0.3077535  | -41.96901  |
| cg22947000 | BCMO1    | 16 | 79829782  | 0.1816216 | 0.1480006  | -13.91398 | 0.1309284  | -36.65204 | 0.1281227  | -49.55472  |
| cg23061257 | YIPF1    | 1  | 54127860  | 0.1551732 | 0.1103864  | -33.28962 | 0.1166855  | -22.44753 | 0.108699   | -42.65144  |
| cg23067535 | FAM83A   | 8  | 124264314 | 0.7437372 | 0.6543494  | -83.18351 | 0.628466   | -82.8336  | 0.6117385  | -194.8828  |
| cg23124451 | CBX7     | 22 | 37878077  | 0.6507345 | 0.5122378  | -167.6718 | 0.4700181  | -294.8397 | 0.4663452  | -320.7212  |
| cg23282949 | RENBP    | X  | 152864903 | 0.8968359 | 0.8721508  | -14.57364 | 0.8568401  | -39.48046 | 0.8527325  | -56.44999  |
| cg23322523 | TRIM55   | 8  | 67201595  | 0.7533504 | 0.7096     | -18.91834 | 0.7029912  | -25.11024 | 0.6924413  | -45.38811  |
| cg23352030 | PRIC285  | 20 | 61668913  | 0.9353507 | 0.8992279  | -51.58812 | 0.9128703  | -19.03117 | 0.8481328  | -263.2675  |
| cg23665958 | BCL10    | 1  | 85517641  | 0.6873814 | 0.6439888  | -14.67131 | 0.6387542  | -18.58012 | 0.5803967  | -113.23257 |
| cg23679724 | CTSZ     | 20 | 57014873  | 0.771009  | 0.7174453  | -30.57389 | 0.7172462  | -30.00099 | 0.6918026  | -78.23668  |
| cg23762517 | HIVEP3   | 1  | 42156697  | 0.2853161 | 0.1728565  | -151.7051 | 0.178654   | -131.9892 | 0.1544374  | -231.1706  |
| cg24012925 | SRXN1    | 20 | 581418    | 0.1777895 | 0.1453408  | -13.07971 | 0.1356142  | -24.13297 | 0.1158572  | -70.04457  |
| cg24058132 | GALC     | 14 | 87529619  | 0.5421203 | 0.4787577  | -27.52561 | 0.486671   | -19.84936 | 0.4375028  | -93.05412  |
| cg24330042 | GSTT1    | 22 | 22714159  | 0.0921893 | 0.06588621 | -15.51082 | 0.1410156  | 44.31931  | 0.06502655 | -21.32696  |
| cg24341800 | ACAT1    | 11 | 107497286 | 0.2117008 | 0.1714588  | -18.18376 | 0.1721956  | -17.00681 | 0.1758029  | -17.85216  |
| cg24429636 | LHD      | 16 | 73708245  | 0.6230753 | 0.4670582  | -210.5889 | 0.5268039  | -73.90016 | 0.4950964  | -146.71    |
| cg24816298 | PTH      | 11 | 13475601  | 0.7246433 | 0.6711123  | -26.43134 | 0.6213718  | -104.3404 | 0.6566975  | -38.72764  |
| cg24833277 | FAM83A   | 8  | 124263542 | 0.8908029 | 0.84264    | -50.99458 | 0.8460475  | -42.50347 | 0.8296934  | -90.75523  |
| cg24857721 | RHD      | 1  | 25471642  | 0.617856  | 0.5558915  | -28.21996 | 0.5654922  | -18.85444 | 0.5144179  | -95.22674  |
| cg24875415 | CST4     | 20 | 23617470  | 0.8770348 | 0.8416546  | -26.01077 | 0.8319197  | -41.98254 | 0.8384681  | -37.19241  |
| cg24921858 | BCL2L14  | 12 | 12115256  | 0.4280857 | 0.3791791  | -15.56054 | 0.3722857  | -20.8328  | 0.3398042  | -68.94533  |
| cg25017250 | APOC4    | 19 | 50137553  | 0.5961902 | 0.5369097  | -16.06915 | 0.5391786  | -14.01334 | 0.5090104  | -51.10353  |
| cg25068857 | GNLY     | 7  | 85717493  | 0.7254441 | 0.6591101  | -38.21384 | 0.6787733  | -16.54465 | 0.625451   | -101.7388  |
| cg25136926 | DDX12    | 12 | 9493486   | 0.7040716 | 0.6559412  | -19.49061 | 0.6615991  | -14.31994 | 0.6209011  | -71.87038  |
| cg25165880 | ACOT7    | 1  | 6376913   | 0.2043196 | 0.1694282  | -13.38187 | 0.1622767  | -20.57392 | 0.1468505  | -51.42184  |
| cg25218351 | TRIM54   | 2  | 27358950  | 0.8328992 | 0.792357   | -24.65364 | 0.7920827  | -24.40263 | 0.7606903  | -89.42401  |
| cg25256723 | F5       | 1  | 167822568 | 0.7105737 | 0.6220706  | -73.74373 | 0.6030378  | -109.3415 | 0.5487592  | -268.658   |
| cg25268716 | PSME1    | 14 | 23674551  | 0.5719652 | 0.5269256  | -13.51428 | 0.5112184  | -24.87027 | 0.4752236  | -80.08691  |
| cg25310567 | GALNTL5  | 7  | 151218423 | 0.8438885 | 0.8943569  | -26.76747 | 0.8849735  | -26.05774 | 0.8061853  | -172.8839  |
| cg25538571 | FLJ46365 | 8  | 49656263  | 0.3857584 | 0.3283307  | -24.15179 | 0.3174008  | -35.35526 | 0.2814884  | -104.9487  |
| cg25557858 | EXTL3    | 8  | 28614517  | 0.1288604 | 0.0957425  | -19.12427 | 0.09435438 | -20.77088 | 0.0886004  | -36.93114  |
| cg25564800 | KPNA1    | 3  | 123716824 | 0.1085727 | 0.08041912 | -15.60829 | 0.08044456 | -15.22511 | 0.06905092 | -40.87834  |
| cg25771201 | SCDR10   | 19 | 5630653   | 0.907773  | 0.8838441  | -15.39915 | 0.87775    | -24.49479 | 0.8424509  | -125.2049  |
| cg25909905 | ITGA2B   | 17 | 39623254  | 0.6346756 | 0.5622411  | -40.97349 | 0.5513499  | -54.55177 | 0.5045612  | -153.7741  |
| cg25922709 | RASA3    | 9  | 19038850  | 0.1807594 | 0.1230309  | -21.05669 | 0.1245477  | -18.33866 | 0.1017442  | -69.82596  |
| cg25915982 | GRB10    | 7  | 50816909  | 0.8522021 | 0.8199136  | -17.3407  | 0.8130377  | -25.63407 | 0.7634231  | -144.5381  |
| cg2599474  | ADH1C    | 4  | 100492992 | 0.4726717 | 0.4265333  | -13.19249 | 0.4251884  | -13.71175 | 0.3871491  | -62.18964  |
| cg26119740 | PPME1    | 11 | 73559653  | 0.1875707 | 0.1426717  | -27.03959 | 0.1400189  | -30.30882 | 0.1314453  | -53.28797  |
| cg26128441 | P2RX3    | 11 | 56881915  | 0.9041345 | 0.8806878  | -14.13474 | 0.8808575  | -13.55926 | 0.8788829  | -21.08787  |
| cg26143719 | C10orf16 | 22 | 35914173  | 0.868539  | 0.8294892  | -29.80188 | 0.8004308  | -89.76324 | 0.7498895  | -266.0611  |
| cg26229676 | ZNF581   | 19 | 60846184  | 0.2161359 | 0.1694194  | -25.46974 | 0.1754344  | -17.92093 | 0.1693936  | -31.02465  |
| cg26267561 | OXT      | 20 | 3000224   | 0.7993829 | 0.7429046  | -40.88748 | 0.7149252  | -91.4335  | 0.6439264  | -314.9143  |
| cg26394940 | FLJ10945 | 22 | 44828125  | 0.1340013 | 0.07049432 | -90.09142 | 0.07173273 | -85.17302 | 0.05783389 | -150.4443  |
| cg26580095 | BTBD8    | 1  | 92318238  | 0.4472275 | 0.3742761  | -38.96939 | 0.3648451  | -50.28468 | 0.3462775  | -89.87976  |
| cg26581729 | NPDC1    | 9  | 139059613 | 0.4418344 | 0.3428852  | -77.89127 | 0.3671974  | -40.13657 | 0.3000652  | -188.3554  |
| cg26614073 | SCAP     | 3  | 47492823  | 0.4955871 | 0.3872084  | -91.46643 | 0.3589535  | -152.7899 | 0.3378962  | -225.5599  |
| cg26628847 | PIP      | 7  | 142539426 | 0.7061286 | 0.6585046  | -18.0849  | 0.661655   | -16.09482 | 0.6018243  | -112.8273  |
| cg26673195 | GSPC     | 17 | 38306255  | 0.5431584 | 0.4905401  | -17.98677 | 0.4775415  | -29.12919 | 0.4138118  | -144.1031  |
| cg26823505 | CLPS     | 6  | 35873567  | 0.5404626 | 0.4831643  | -21.89124 | 0.4876231  | -17.79844 | 0.4267643  | -110.4877  |
| cg26847866 | SCARA3   | 8  | 27547996  | 0.6720755 | 0.5945624  | -51.1212  | 0.5807397  | -17.74827 | 0.5213217  | -218.413   |
| cg26884581 | PYGM     | 11 | 64283990  | 0.8489541 | 0.8177189  | -15.66057 | 0.8165218  | -16.71948 | 0.802942   | -42.38471  |
| cg26987645 | FMOD     | 1  | 201587009 | 0.4245825 | 0.3109714  | -108.6062 | 0.3308576  | -69.98154 | 0.3138541  | -112.36226 |
| cg27016307 | HRC      | 18 | 54380725  | 0.4441126 | 0.345825   | -76.88531 | 0.3347009  | -96.38995 | 0.2961939  | -354.0796  |
| cg27031230 | SLC11    | 16 | 49273090  | 0.5594671 | 0.4940704  | -29.91157 | 0.5121567  | -13.83252 | 0.4528368  | -97.17306  |
| cg27112247 | TMED2    | 12 | 122634284 | 0.441677  | 0.3744161  | -32.50489 | 0.3829506  | -23.06379 | 0.3717043  | -41.79631  |
| cg27210390 | TOM1L1   | 17 | 50333582  | 0.4995541 | 0.4212053  | -44.49513 | 0.3960351  | -81.96963 | 0.3554613  | -184.5669  |
| cg27235662 | CLDN16   | 3  | 191588680 | 0.7749882 | 0.7295283  | -22.71526 | 0.7376781  | -14.25232 | 0.687082   | -99.26525  |
| cg27236973 | KRT17    | 17 | 37035523  | 0.1449301 | 0.1137504  | -14.80072 | 0.1059825  | -24.86033 | 0.1001308  | -42.12353  |
| cg27446185 | VITGN1   | 1  | 117555488 | 0.7922848 | 0.7514774  | -19.5257  | 0.7548881  | -15.78338 | 0.6996889  | -116.3049  |
| cg27552599 | DHX35    | 20 | 37023885  | 0.1557893 | 0.1159592  | -25.27202 | 0.1171501  | -22.56957 | 0.1259802  | -16.08888  |



**Table S3.** List of 150 CpG loci significantly hypermethylated in centenarians' offspring vs offspring of non long-lived parents. Columns indicate: Illumina Probe ID (ILMNID), NCBI gene symbol of associated gene (SYMBOL), chromosome localisation (CHR) and map informations (MAPINFO). For each probe we reported AVG beta in each group and Diff Score, that indicates the level of significance between the 2 groups.

| ILMNID    | SYMBOL    | CHR | MAPINFO   | CENTENARIANS' OFFSPRING.AVG_Beta | LONG-LIVED OFFSPRING.AVG_Beta | DIFFSCORE |
|-----------|-----------|-----|-----------|----------------------------------|-------------------------------|-----------|
| cg1007201 | CLEC4A    | 12  | 8196472   | 0.9058203                        | 0.8747801                     | 16.48852  |
| cg1026741 | NAP1L5    | 1   | 89838076  | 0.6711563                        | 0.5996045                     | 33.78366  |
| cg0118508 | ZNF710    | 15  | 88344817  | 0.6588492                        | 0.5777963                     | 45.18841  |
| cg0151265 | PCDH3     | 5   | 140461151 | 0.3482213                        | 0.2910347                     | 16.02714  |
| cg0167175 | CMTM8     | 3   | 32254265  | 0.5210842                        | 0.45922                       | 18.12009  |
| cg0188856 | MEST      | 7   | 129913749 | 0.08135256                       | 0.04772861                    | 23.56815  |
| cg0208257 | CLEC4A    | 12  | 8167985   | 0.3669071                        | 0.3106213                     | 16.4786   |
| cg0209652 | FCF116    | X   | 76586156  | 0.8536305                        | 0.8171788                     | 15.42934  |
| cg0219665 | NOL10     | 2   | 10748215  | 0.3744256                        | 0.2907426                     | 49.6485   |
| cg0227666 | CTNNA1    | 5   | 138116341 | 0.3660563                        | 0.2972512                     | 29.26704  |
| cg0229800 | RAB39B    | X   | 154147098 | 0.3246999                        | 0.2462328                     | 29.26704  |
| cg0260366 | RPS21     | 20  | 60395435  | 0.03154509                       | 0.009576178                   | 29.26704  |
| cg0284750 | SOX3      | X   | 139414850 | 0.5017757                        | 0.4355108                     | 29.26704  |
| cg0319082 | CY4F11    | 19  | 15909788  | 0.1748005                        | 0.1266311                     | 29.26704  |
| cg0321469 | SEC14L4   | 22  | 29231532  | 0.1403483                        | 0.1042111                     | 29.26704  |
| cg0333616 | SLC22A18  | 11  | 2887571   | 0.7015352                        | 0.6012433                     | 29.26704  |
| cg0348362 | KCNA3     | 1   | 111019799 | 0.3596648                        | 0.3031791                     | 29.26704  |
| cg0366545 | LOC158160 | 10  | 38685382  | 0.1822067                        | 0.1142037                     | 29.26704  |
| cg0370438 | ZNF169    | 9   | 96061822  | 0.9160351                        | 0.8062755                     | 29.26704  |
| cg0387412 | ARHGAP2   | 6   | 109275828 | 0.494431                         | 0.4185771                     | 29.26704  |
| cg0388230 | TRIM50C   | 7   | 72077882  | 0.8609829                        | 0.8123671                     | 29.26704  |
| cg0388778 | CTSW      | 11  | 65404108  | 0.2112481                        | 0.1622314                     | 29.26704  |
| cg0472620 | SLC22A18  | 11  | 2887061   | 0.7836428                        | 0.7306587                     | 29.26704  |
| cg0500044 | MGC1945   | 9   | 39032395  | 0.253095                         | 0.2039423                     | 29.26704  |
| cg0507200 | FIGL1     | 7   | 50486141  | 0.3883249                        | 0.3311644                     | 29.26704  |
| cg0519472 | NRP2      | 12  | 2814741   | 0.4020761                        | 0.3249024                     | 29.26704  |
| cg0547152 | STK6      | 20  | 54402011  | 0.3515774                        | 0.2836455                     | 29.26704  |
| cg0551275 | UGT3A1    | 5   | 36027492  | 0.393362                         | 0.3386148                     | 29.26704  |
| cg0553511 | CHST4     | 16  | 70117080  | 0.4242371                        | 0.3624282                     | 29.26704  |
| cg0572610 | GP1BB     | 22  | 18089755  | 0.8805739                        | 0.8351569                     | 29.26704  |
| cg0589704 | HRASL3    | 11  | 63138719  | 0.2445276                        | 0.1984742                     | 29.26704  |
| cg0605165 | PDDZ4     | X   | 152749880 | 0.2301341                        | 0.186302                      | 29.26704  |
| cg0633121 | COG2      | 7   | 16472127  | 0.3556928                        | 0.3031003                     | 29.26704  |
| cg0641060 | TSPAN6    | X   | 89770449  | 0.2116177                        | 0.1672570                     | 29.26704  |
| cg0649478 | KIERS2    | 12  | 51261713  | 0.6141715                        | 0.5318322                     | 29.26704  |
| cg0663845 | FAM107A   | 3   | 58538309  | 0.7242832                        | 0.6610957                     | 29.26704  |
| cg0681284 | TRPM2     | 21  | 44598210  | 0.4488589                        | 0.379546                      | 29.26704  |
| cg0742314 | CHIL3     | 1   | 201422869 | 0.4990132                        | 0.4209464                     | 29.26704  |
| cg0745327 | NDUFA3    | 19  | 69297516  | 0.164499                         | 0.2519505                     | 29.26704  |
| cg0760132 | SLC38A4   | 12  | 45506108  | 0.3694968                        | 0.2549278                     | 29.26704  |
| cg0774279 | C21orf56  | 21  | 46428480  | 0.2062344                        | 0.1238415                     | 29.26704  |
| cg0804469 | BRD4      | 19  | 15252927  | 0.3288558                        | 0.2731871                     | 29.26704  |
| cg0812621 | KAAG1     | 6   | 24465699  | 0.2731546                        | 0.2186189                     | 29.26704  |
| cg0869486 | FLJ30048  | 13  | 77219585  | 0.8005941                        | 0.5335224                     | 29.26704  |
| cg0851045 | B5N       | 3   | 4956512   | 0.2862822                        | 0.2176569                     | 29.26704  |
| cg0851640 | C14orf166 | 14  | 51525512  | 0.3111252                        | 0.2575823                     | 29.26704  |
| cg0900938 | PKP1      | 1   | 199519597 | 0.35288                          | 0.2970912                     | 29.26704  |
| cg0937748 | BIRC8     | 19  | 58486766  | 0.8021271                        | 0.7462544                     | 29.26704  |
| cg0958204 | ITR       | 13  | 94051677  | 0.3034467                        | 0.2518176                     | 29.26704  |
| cg0987131 | H0X2      | 7   | 27108207  | 0.2381952                        | 0.1825476                     | 29.26704  |
| cg0994835 | FLJ2504   | 2   | 70042596  | 0.5442603                        | 0.4786369                     | 29.26704  |
| cg1029623 | C21orf56  | 21  | 46429602  | 0.3855833                        | 0.2897246                     | 29.26704  |
| cg1036247 | SHANK2    | 11  | 70185473  | 0.578801                         | 0.4856244                     | 29.26704  |
| cg1046870 | PTGER1    | 19  | 14446209  | 0.7650406                        | 0.7011663                     | 29.26704  |
| cg1077126 | TCF21     | 6   | 134251673 | 0.2496838                        | 0.1756231                     | 29.26704  |
| cg1089538 | ECRG4     | 2   | 106049072 | 0.5456443                        | 0.4403558                     | 29.26704  |
| cg1104930 | KIA1166   | X   | 641134716 | 0.2443512                        | 0.1903068                     | 29.26704  |
| cg1112613 | FLJ14834  | 13  | 30378304  | 0.2479834                        | 0.1747009                     | 29.26704  |
| cg1123542 | DUSP22    | 6   | 237622    | 0.3060670                        | 0.1818786                     | 29.26704  |
| cg1129100 | ARHGEP9   | X   | 62891792  | 0.5287751                        | 0.4725753                     | 29.26704  |
| cg1146977 | ARHGEP4   | 2   | 131390671 | 0.4060053                        | 0.3503547                     | 29.26704  |
| cg1150072 | CHNF      | 19  | 47586285  | 0.512978                         | 0.4511062                     | 29.26704  |
| cg1161857 | KRTCAF3   | 2   | 27519047  | 0.7484122                        | 0.6912776                     | 29.26704  |
| cg1255807 | MBP       | 18  | 72874110  | 0.6862947                        | 0.616442                      | 29.26704  |
| cg1256445 | CETP      | 16  | 55553341  | 0.6451489                        | 0.5887925                     | 29.26704  |
| cg1271720 | FLJ90036  | 4   | 114342    | 0.126605                         | 0.0847067                     | 29.26704  |
| cg1290764 | SAAT      | 11  | 18226917  | 0.5525165                        | 0.4931746                     | 29.26704  |
| cg1297365 | CHNF      | 19  | 47586293  | 0.3026898                        | 0.2438908                     | 29.26704  |
| cg1310590 | KIA0233   | 14  | 23969894  | 0.1709462                        | 0.1176398                     | 29.26704  |
| cg1316430 | CDA       | 1   | 20770604  | 0.7678744                        | 0.7225301                     | 29.26704  |
| cg1350742 | KLHDC7A   | 1   | 18680137  | 0.8202931                        | 0.7778499                     | 29.26704  |
| cg1356043 | KFZP78111 | 5   | 56284344  | 0.1337178                        | 0.2504783                     | 29.26704  |
| cg1383720 | PAGE5     | X   | 55263702  | 0.7702178                        | 0.7204388                     | 29.26704  |
| cg1444810 | MATN4     | 20  | 4336970   | 0.9128964                        | 0.8814726                     | 29.26704  |
| cg1457036 | RAPP2     | X   | 131178224 | 0.4198136                        | 0.3261118                     | 29.26704  |
| cg1457882 | RPS6KC1   | 1   | 211291025 | 0.4334208                        | 0.3487341                     | 29.26704  |
| cg1465473 | FLJ30834  | 4   | 122904595 | 0.5697716                        | 0.506355                      | 29.26704  |
| cg1475343 | ALX4      | 11  | 44261409  | 0.3761834                        | 0.3108526                     | 29.26704  |
| cg1480730 | AR        | X   | 66880170  | 0.816828                         | 0.7861701                     | 29.26704  |
| cg1491139 | SEMA3B    | 3   | 50286217  | 0.1667752                        | 0.1264965                     | 29.26704  |
| cg1492084 | NAV1      | 1   | 199864502 | 0.5835653                        | 0.5183972                     | 29.26704  |
| cg1497398 | TETRA2    | 4   | 2905480   | 0.2877994                        | 0.2243257                     | 29.26704  |
| cg1524803 | CCIN      | 9   | 36159949  | 0.3750819                        | 0.3192108                     | 29.26704  |
| cg1537568 | TBX22     | X   | 79164589  | 0.3792685                        | 0.3136004                     | 29.26704  |
| cg1538312 | DUSP22    | 6   | 236909    | 0.3925775                        | 0.2639296                     | 29.26704  |
| cg1548437 | SAAT      | 11  | 18244223  | 0.5062668                        | 0.4343419                     | 29.26704  |
| cg1553623 | H2BFS     | 21  | 43809520  | 0.479108                         | 0.419566                      | 29.26704  |
| cg1558481 | SLC38A4   | 12  | 45503893  | 0.3358932                        | 0.2133897                     | 29.26704  |
| cg1569164 | SLC17A3   | 6   | 25990307  | 0.7703478                        | 0.7223748                     | 29.26704  |
| cg1572053 | AGPAT2    | 9   | 138702406 | 0.6285096                        | 0.5262718                     | 29.26704  |
| cg1579268 | FLJ90036  | 4   | 114693    | 0.1135461                        | 0.0697849                     | 29.26704  |
| cg1581295 | VCY       | Y   | 14877478  | 0.5937284                        | 0.5163629                     | 29.26704  |
| cg1590178 | KCTD12    | 13  | 76359427  | 0.7607736                        | 0.7154112                     | 29.26704  |
| cg1600329 | PLINC1    | 6   | 83457929  | 0.6780141                        | 0.6185507                     | 29.26704  |
| cg1607594 | FLJ37396  | 6   | 109664391 | 0.608                            | 0.538902                      | 29.26704  |
| cg1608055 | TACSTD2   | 1   | 58815787  | 0.460412                         | 0.4003999                     | 29.26704  |
| cg1647469 | MGC3207   | 19  | 13736014  | 0.3014212                        | 0.1962413                     | 29.26704  |
| cg1650904 | TRPM6     | 9   | 76692783  | 0.2715708                        | 0.222452                      | 29.26704  |
| cg1654734 | USP29     | 19  | 62322503  | 0.6900259                        | 0.592893                      | 29.26704  |
| cg1654752 | FLJ3790   | 11  | 74818328  | 0.6867868                        | 0.6068288                     | 29.26704  |
| cg1689361 | ALX3      | 1   | 110415973 | 0.841393                         | 0.8045731                     | 29.26704  |
| cg1706619 | SYCE1     | 10  | 135233117 | 0.4067155                        | 0.3469113                     | 29.26704  |
| cg1768796 | KLK3      | 19  | 56050056  | 0.7267419                        | 0.6725357                     | 29.26704  |
| cg1779165 | POU3F1    | 1   | 38286076  | 0.6434201                        | 0.555832                      | 29.26704  |
| cg1806219 | HDH40     | 17  | 54997457  | 0.8177519                        | 0.7749996                     | 29.26704  |
| cg1853076 | SULT1A1   | 16  | 28542345  | 0.0857085                        | 0.0583054                     | 29.26704  |
| cg1893416 | STARDB    | 18  | 50136187  | 0.4568523                        | 0.3890576                     | 29.26704  |
| cg1909443 | BCAR1     | 16  | 73843510  | 0.5495519                        | 0.4846034                     | 29.26704  |
| cg1948627 | DB2       | 11  | 47192476  | 0.1073998                        | 0.0739193                     | 29.26704  |
| cg1949744 | SLC22A18  | 11  | 2887370   | 0.8845521                        | 0.8503212                     | 29.26704  |
| cg1976274 | CRX       | 19  | 53016901  | 0.2539462                        | 0.2048472                     | 29.26704  |
| cg1978646 | C21orf128 | 21  | 42401274  | 0.0526476                        | 0.05996704                    | 29.26704  |
| cg2025191 | GLTP2     | 17  | 8570149   | 0.8578737                        | 0.4944427                     | 29.26704  |
| cg2054042 | PPP4R2    | 3   | 73128376  | 0.5150797                        | 0.4468043                     | 29.26704  |
| cg2058716 | MGC33407  | 19  | 8669829   | 0.426839                         | 0.3519028                     | 29.26704  |
| cg2083170 | SEC31L2   | 10  | 102269363 | 0.6351607                        | 0.5551777                     | 29.26704  |
| cg2108029 | PRPS1     | X   | 106758134 | 0.1875643                        | 0.1424033                     | 29.26704  |
| cg2130677 | FLJ44881  | 18  | 72539998  | 0.6886059                        | 0.6130321                     | 29.26704  |
| cg2183244 | TTCC      | 21  | 37360393  | 0.5132032                        | 0.5135027                     | 29.26704  |
| cg2198088 | TP53TG3   | 16  | 32171905  | 0.5948204                        | 0.534114                      | 29.26704  |

|           |           |    |           |            |            |          |
|-----------|-----------|----|-----------|------------|------------|----------|
| g2215892  | FLJ39237  | 7  | 100610889 | 0.5304557  | 0.4449231  | 29.26704 |
| g2218901  | FGF22     | 19 | 591348    | 0.755807   | 0.7029672  | 29.26704 |
| g22269967 | S100P     | 4  | 6746599   | 0.366414   | 0.3069793  | 29.26704 |
| g22381194 | DHODH     | 16 | 70598977  | 0.3839963  | 0.3224816  | 29.26704 |
| g2243290  | KLRC2     | 12 | 10479483  | 0.8110396  | 0.7421967  | 29.26704 |
| g2247229  | ZNF577    | 19 | 57083292  | 0.6279387  | 0.5609133  | 29.26704 |
| g22778981 | ERBB2     | 17 | 35109659  | 0.4698896  | 0.4077442  | 29.26704 |
| g22825487 | VNN3      | 6  | 133096876 | 0.2991657  | 0.2485382  | 29.26704 |
| g23137494 | SLC16A2   | X  | 73556534  | 0.365716   | 0.3086705  | 29.26704 |
| g2314905  | MMP17     | 12 | 130878158 | 0.6216299  | 0.7339891  | 29.26704 |
| g23159337 | ATP13A4   | 3  | 184755472 | 0.5607895  | 0.4599691  | 29.26704 |
| g23163644 | TCEAL2    | X  | 101267674 | 0.1670968  | 0.1191814  | 29.26704 |
| g23616741 | PGAM2     | 7  | 44071959  | 0.4442845  | 0.3579283  | 29.26704 |
| g24127874 | HES6      | 2  | 238814598 | 0.2794232  | 0.219719   | 29.26704 |
| g24831427 | COQ3      | 6  | 99949074  | 0.78253    | 0.7350434  | 29.26704 |
| g24883857 | ARSB      | 5  | 78317855  | 0.4871896  | 0.43322    | 29.26704 |
| g25193494 | FLJ20186  | 16 | 88543505  | 0.7001533  | 0.6369217  | 29.26704 |
| g2542763  | CYP2A7    | 19 | 46081197  | 0.8495561  | 0.8050985  | 29.26704 |
| g2568318  | ACRBP     | 12 | 6626349   | 0.635309   | 0.5668334  | 29.26704 |
| g25912611 | STK6      | 20 | 54402033  | 0.2993129  | 0.2306572  | 29.26704 |
| g2605775  | PGAM2     | 7  | 44071460  | 0.4787578  | 0.4211679  | 29.26704 |
| g26133324 | LOESA     | 1  | 150861946 | 0.3324185  | 0.269443   | 29.26704 |
| g2664745  | C4orf17   | 4  | 100651185 | 0.504596   | 0.4407295  | 29.26704 |
| g2695266  | CTHRC1    | 8  | 104452675 | 0.07926963 | 0.04038038 | 29.26704 |
| g2717834  | CSH2      | 17 | 59304304  | 0.8752692  | 0.8430981  | 29.26704 |
| g27182761 | PHLDA1    | 12 | 74712860  | 0.3706783  | 0.3166243  | 29.26704 |
| g2739448  | C15orf2   | 15 | 22472147  | 0.833357   | 0.7803816  | 29.26704 |
| g2765586  | CS19L     | 20 | 23497455  | 0.7144582  | 0.6581914  | 29.26704 |
| g1077126  | TCF21     | 6  | 134251673 | 0.2496838  | 0.175231   | 29.26704 |
| g3665457  | LOC158160 | 10 | 38665382  | 0.1822067  | 0.1142037  | 29.26704 |

**Table S4.** List of 67 CpG loci significantly hypomethylated in centenarians/offspring vs offspring of non long-lived parents. Columns indicate: Illumina Probe ID (ILMNID), NCBI gene symbol of associated gene (SYMBOL), chromosome localisation (CHR) and map informations (MAPINFO). For each probe we reported AVG beta in each group and Diff Score, that indicates the level of significance between the 2 groups.

| ILMNID     | SYMBOL   | CHR | MAPINFO   | CENTENARIANS' OFFSPRING.AVG_Beta | OFFSPRING OF NON LONG-LIVED PARENTS.AVG_Beta | DiffScore |
|------------|----------|-----|-----------|----------------------------------|----------------------------------------------|-----------|
| cg00695416 | CBR1     | 21  | 36364346  | 0.02625524                       | 0.0599491                                    | -32.501   |
| cg00729708 | LASS3    | 15  | 98901965  | 0.5210772                        | 0.5806562                                    | -17.00673 |
| cg00750606 | CDA      | 1   | 20771708  | 0.7162282                        | 0.77032                                      | -24.03238 |
| cg00894577 | SLC6A14  | X   | 115482720 | 0.3670236                        | 0.4439165                                    | -34.88451 |
| cg01626227 | TRIM4    | 7   | 99355225  | 0.02149694                       | 0.04910073                                   | -21.35977 |
| cg01903378 | ZNF645   | X   | 22201351  | 0.4415189                        | 0.5070216                                    | -21.39557 |
| cg02286642 | ZNF254   | 19  | 24061913  | 0.05308367                       | 0.081513                                     | -13.92137 |
| cg03146158 | MYO1E    | 15  | 57452437  | 0.02085402                       | 0.05670013                                   | -40.98652 |
| cg03060258 | GNAS     | 20  | 56860330  | 0.5857949                        | 0.6423887                                    | -16.57705 |
| cg04612566 | C8orf31  | 8   | 144192081 | 0.5699517                        | 0.6466464                                    | -37.7047  |
| cg04738970 | HOUK2    | 3   | 126831301 | 0.2294626                        | 0.2893352                                    | -30.01746 |
| cg04836038 | DOCK9    | 13  | 98537383  | 0.1121584                        | 0.1492027                                    | -14.66257 |
| cg05105069 | TCEAL7   | X   | 102472010 | 0.2497188                        | 0.3058061                                    | -19.65026 |
| cg05163071 | RETNLB   | 3   | 109959230 | 0.5522572                        | 0.6108653                                    | -17.00673 |
| cg05592527 | ARMCX6   | X   | 100759644 | 0.2028322                        | 0.2533108                                    | -18.12009 |
| cg05801444 | VPS28    | 8   | 145629443 | 0.5329066                        | 0.6004692                                    | -24.98316 |
| cg05903362 | ARHGAP4  | X   | 152945948 | 0.10230721                       | 0.1775576                                    | -59.51278 |
| cg06274159 | ZFP42    | 4   | 189153861 | 0.0703513                        | 0.1101126                                    | -25.91772 |
| cg06378976 | TFEB     | 6   | 41811591  | 0.1953826                        | 0.2445421                                    | -17.97049 |
| cg06799664 | DNAH1    | 17  | 74078716  | 0.7875283                        | 0.8272511                                    | -15.35457 |
| cg06809565 | CXorf12  | X   | 152889981 | 0.1016981                        | 0.1440083                                    | -23.02919 |
| cg06873352 | LYK5     | 17  | 59173747  | 0.1696681                        | 0.2124577                                    | -14.86253 |
| cg07465884 | YTHDC2   | 5   | 112877061 | 0.2713465                        | 0.3385677                                    | -29.50736 |
| cg07770222 | C8orf1   | 8   | 144191481 | 0.4851994                        | 0.5531039                                    | -23.02919 |
| cg08015232 | SLC12A5  | 20  | 44090522  | 0.5956001                        | 0.6502197                                    | -15.16856 |
| cg09324116 | FAM51A1  | X   | 13856202  | 0.058913                         | 0.0934184                                    | -21.66043 |
| cg10051054 | CCDC27   | 1   | 3659032   | 0.8027164                        | 0.8454887                                    | -21.9237  |
| cg10117369 | LAX1     | 1   | 202000879 | 0.298004                         | 0.3515861                                    | -14.70446 |
| cg10699098 | OLP2     | 19  | 19509555  | 0.4365512                        | 0.4930763                                    | -13.88079 |
| cg10742801 | PRAP1    | 10  | 135011037 | 0.3690253                        | 0.4257841                                    | -14.86253 |
| cg10801213 | SLC7A3   | X   | 70067447  | 0.1354528                        | 0.178301                                     | -17.91682 |
| cg10839723 | TBL1X    | X   | 9392900   | 0.06423201                       | 0.09375927                                   | -13.10461 |
| cg12067261 | INSL4    | 9   | 5221539   | 0.8376483                        | 0.8756055                                    | -21.65477 |
| cg12215675 | TTL2     | 6   | 167658584 | 0.8822597                        | 0.9198208                                    | -36.17066 |
| cg13853761 | C11orf2  | 11  | 64819808  | 0.9043539                        | 0.9292844                                    | -14.86253 |
| cg14159672 | FLI32569 | 1   | 204028902 | 0.1852226                        | 0.3992492                                    | -33.9177  |
| cg14893161 | FLI32569 | 1   | 204085874 | 0.3285304                        | 0.5061365                                    | -27.15013 |
| cg14917512 | GNA11    | 19  | 3045685   | 0.1402024                        | 0.1874757                                    | -22.40688 |
| cg14931645 | ZNF672   | 1   | 247099901 | 0.01654672                       | 0.03900597                                   | -13.37192 |
| cg14986136 | WBP5     | X   | 102497909 | 0.1718055                        | 0.2194878                                    | -18.46742 |
| cg15271816 | RUSC2    | 9   | 35480516  | 0.1278272                        | 0.1657644                                    | -13.42975 |
| cg16022279 | ZNF185   | X   | 151837379 | 0.6623265                        | 0.7136184                                    | -15.76134 |
| cg16029957 | QPCT     | 2   | 37425956  | 0.05102433                       | 0.08117201                                   | -17.78816 |
| cg17006282 | RPL36    | 19  | 5640943   | 0.6965396                        | 0.7586682                                    | -32.501   |
| cg17238009 | C10orf11 | 10  | 77212588  | 0.76162                          | 0.8043618                                    | -15.73526 |
| cg17687883 | MTHFD2   | 2   | 74278975  | 0.03926801                       | 0.09649727                                   | -89.51278 |
| cg17718322 | OPHN1    | X   | 67570474  | 0.07890269                       | 0.1195996                                    | -26.15465 |
| cg17765461 | DAZP1    | 19  | 1359416   | 0.03249041                       | 0.05780741                                   | -14.05583 |
| cg17829936 | TARL5    | 6   | 132952374 | 0.8046887                        | 0.8578239                                    | -42.47289 |
| cg17880859 | RBBP7    | X   | 16798335  | 0.0185628                        | 0.05741211                                   | -51.17289 |
| cg18364820 | CXorf38  | X   | 40391693  | 0.07768952                       | 0.1169911                                    | -24.32239 |
| cg18636641 | PPAPDC3  | 9   | 133155089 | 0.6864967                        | 0.7349071                                    | -14.72395 |
| cg20051589 | DLG3     | X   | 69581207  | 0.1865612                        | 0.2363228                                    | -19.09147 |
| cg20439022 | SLC16A8  | 22  | 36808733  | 0.5538581                        | 0.08369539                                   | -15.67545 |
| cg21098323 | OSCAR    | 19  | 59297454  | 0.8733242                        | 0.7338605                                    | -26.87699 |
| cg21126707 | MYF5     | 12  | 79035143  | 0.445066                         | 0.5004501                                    | -14.01127 |
| cg21950518 | IL6ST    | 5   | 55326503  | 0.06458467                       | 0.09758317                                   | -17.97887 |
| cg23110514 | LCE3E    | 1   | 150805512 | 0.6467896                        | 0.7061541                                    | -22.94379 |
| cg23486067 | PLSCR1   | 3   | 147745021 | 0.03228794                       | 0.05874353                                   | -15.88778 |
| cg23629496 | C20orf75 | 20  | 5962446   | 0.6428477                        | 0.7101136                                    | -32.501   |
| cg24330942 | GGTT1    | 22  | 22714158  | 0.06580821                       | 0.1410156                                    | -16.37222 |
| cg24429836 | LDHD     | 16  | 73708245  | 0.4670582                        | 0.5286608                                    | -16.57705 |
| cg26267310 | DHRS10   | 19  | 54032405  | 0.04300893                       | 0.09429372                                   | -68.1463  |
| cg27519424 | HLC5     | 21  | 37284290  | 0.0598947                        | 0.09114889                                   | -16.57705 |
| cg07770222 | C8orf31  | 8   | 144191481 | 0.4861994                        | 0.5531039                                    | -23.02919 |
| cg13853761 | C11orf2  | 11  | 64819808  | 0.9043539                        | 0.9292844                                    | -14.86253 |
| cg24928161 | SHBG     | 17  | 7473840   | 0.8133382                        | 0.8535168                                    | -20.07014 |

**Table S5.** White Blood Cell Count and Differential in centenarians' offspring and offspring of non long-lived parents. Data are presented as mean  $\pm$  SD. P value has been calculated by t-test. NS: not significant.

|                                                    | <b>Centenarians' offspring</b> | <b>Offspring of non long-lived parents</b> | <b>P</b> |
|----------------------------------------------------|--------------------------------|--------------------------------------------|----------|
| <b>Leukocytes (<math>10^3/\text{mm}^3</math>)</b>  | 6.26 $\pm$ 1.34                | 6.53 $\pm$ 1.64                            | NS       |
| <b>Neutrophils (%)</b>                             | 55.05 $\pm$ 6.8                | 57.45 $\pm$ 8.58                           | NS       |
| <b>Lymphocytes (%)</b>                             | 32.02 $\pm$ 5.98               | 29.43 $\pm$ 8.40                           | NS       |
| <b>Monocytes (%)</b>                               | 6.07 $\pm$ 1.25                | 5.76 $\pm$ 1.23                            | NS       |
| <b>Eosinophils (%)</b>                             | 4.39 $\pm$ 3.08                | 2.73 $\pm$ 1.31                            | NS       |
| <b>Basophils (%)</b>                               | 0.57 $\pm$ 0.22                | 0.47 $\pm$ 0.32                            | NS       |
| <b>Neutrophils (<math>10^3/\text{mm}^3</math>)</b> | 3.59 $\pm$ 1.07                | 3.73 $\pm$ 1.13                            | NS       |
| <b>Lymphocytes (<math>10^3/\text{mm}^3</math>)</b> | 2.04 $\pm$ 0.57                | 1.77 $\pm$ 0.55                            | NS       |
| <b>Monocytes (<math>10^3/\text{mm}^3</math>)</b>   | 0.36 $\pm$ 0.12                | 0.34 $\pm$ 0.09                            | NS       |
| <b>Eosinophils (<math>10^3/\text{mm}^3</math>)</b> | 0.27 $\pm$ 0.20                | 0.18 $\pm$ 0.10                            | NS       |
| <b>Basophils (<math>10^3/\text{mm}^3</math>)</b>   | 0.04 $\pm$ 0.02                | 0.04 $\pm$ 0.03                            | NS       |
